# Supplementary material for: Systemic and mucosal IgA responses are variably induced in response to SARS-CoV-2 mRNA vaccination and are associated with protection against subsequent infection
Source: bioRxiv or medRxiv preprint supplement (doi:10.1101/2021.08.01.21261297), 2022-01-02
Supplement: Supplementary file [file media-1.pdf]

## Supplementary Figures and Supplementary Figure Legends

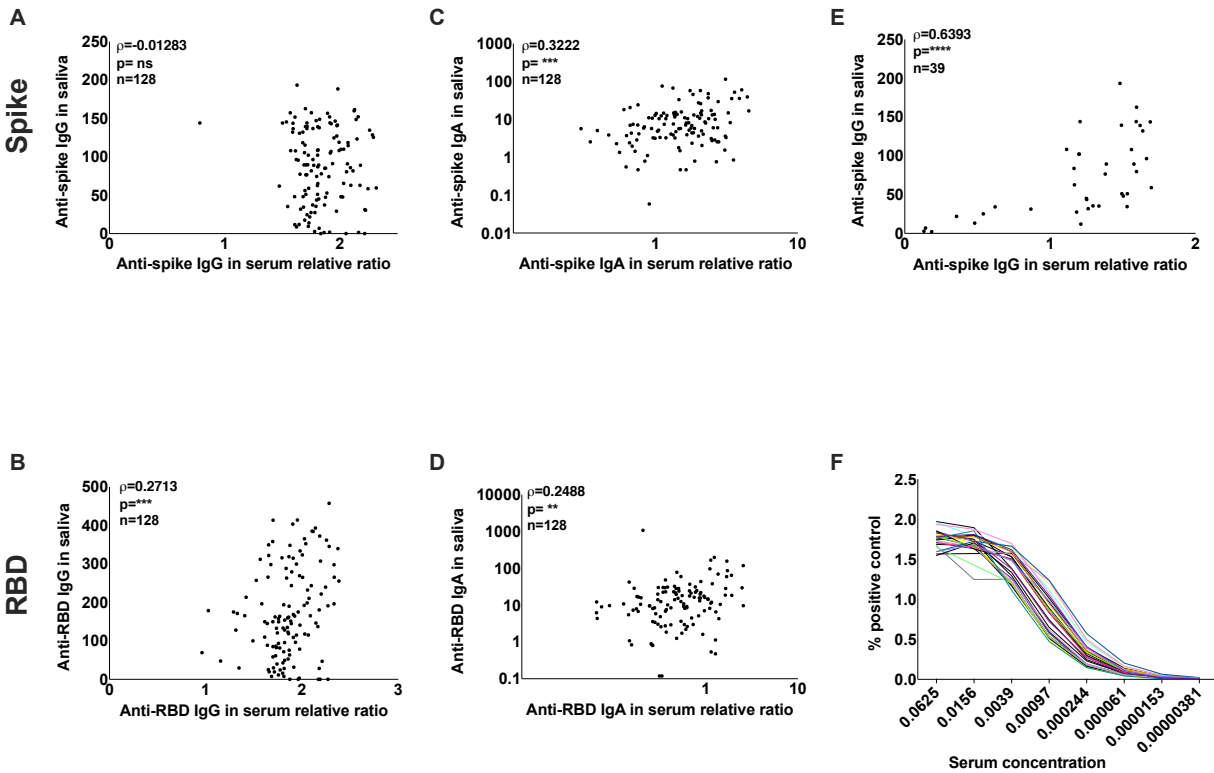

### Supplementary Fig 1. Correlation of anti-spike and anti-RBD antibodies in the saliva and serum after two-doses of mRNA vaccine

(A-D) N=128 Subjects were sampled 2-4 weeks after their second dose of either BNT162b2 or mRNA-1273. The indicated antibody isotypes (IgA and IgG) were analyzed in serum and saliva via an ELISA-based method. A Spearman test was used to calculate the correlation coefficient for each plot. We observed significant positive correlations for anti-RBD IgG (B), anti-Spike IgA (C) and anti-RBD IgA (D) in saliva and serum. We did not observe a significant correlation for anti-Spike IgG antibodies (A); however, this was due to oversaturation of signal in the serum. We therefore repeated the analysis for anti-Spike IgG using a lower concentration on a subset (n=39) of samples (E) using the 3<sup>rd</sup> point on the titration curve (F) and observed a significant positive correlation between serum and saliva titers. ns= not significant, \*\*=p<0.01, \*\*\*=p<0.001 and \*\*\*\*=p<0.0001.

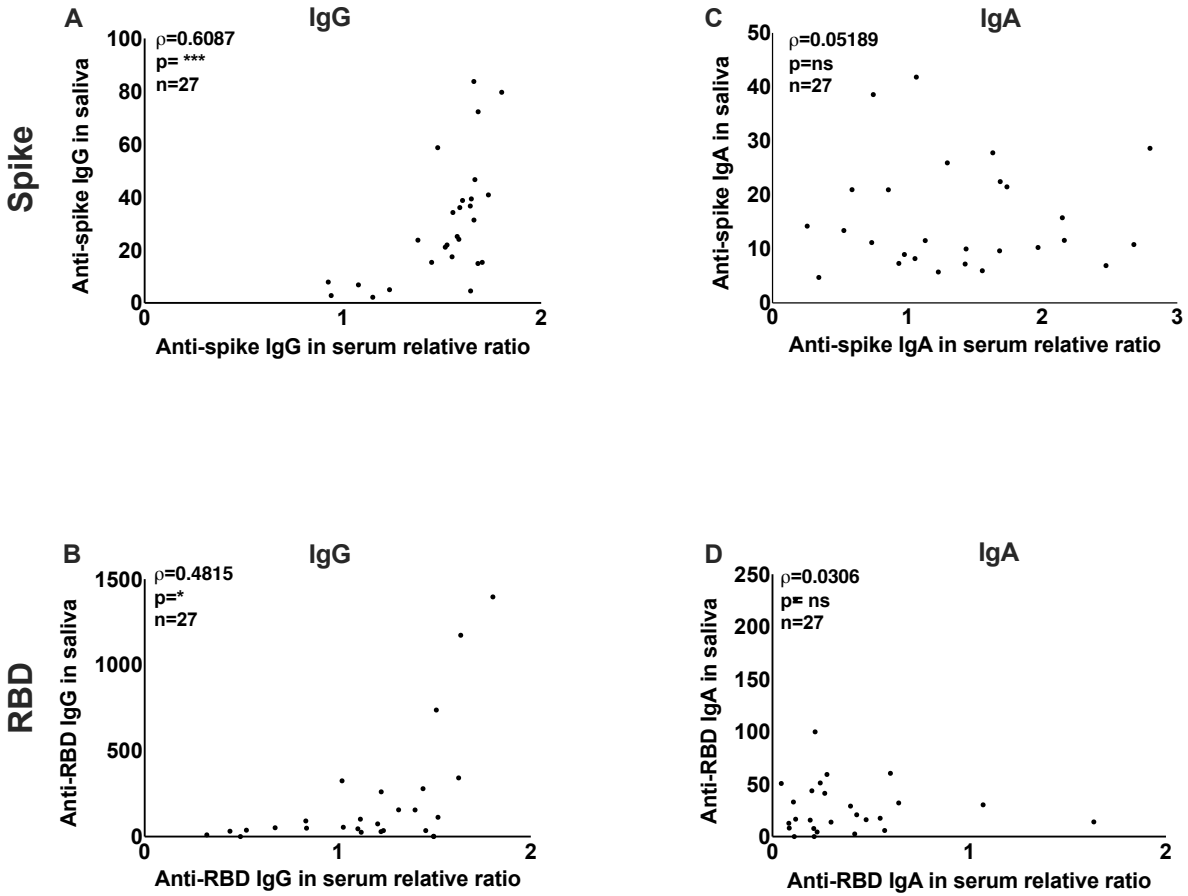

**Supplementary Fig 2. Correlation of anti-spike and anti-RBD antibodies in the saliva and serum after a single dose of mRNA vaccine in the MSB-1 cohort.**

(A-D) N=27 MSB-1 participants were sampled 2-4 weeks after 1 dose with BNT162b2. The indicated antibody isotypes (IgA and IgG) were analyzed in serum and saliva via an ELISA-based method. Spearman test was used to calculate the correlation coefficient for each plot. ns= not significant,  $*$ = $p<0.05$  and  $***$ = $p<0.001$ .

**Effect of incubating recombinant secretory protein  
with  $\alpha$ -secretory antibody prior to use in secretory component ELISA**

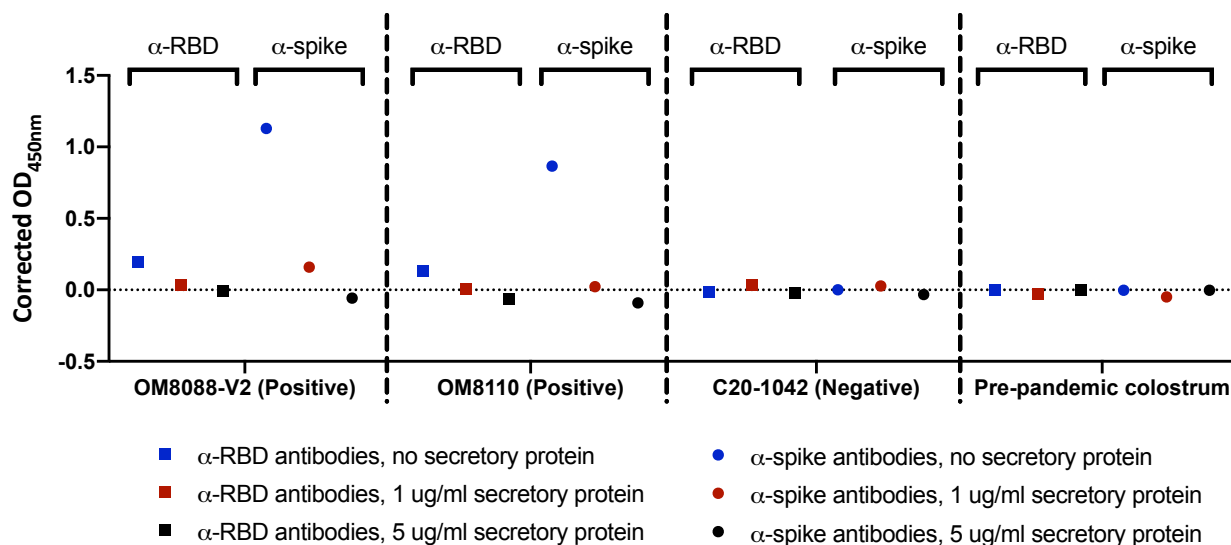

**Supplementary Figure 3. Secretory component detected in antigen-specific antibodies from COVID-19 patient saliva**

Validation of secretory component assay was confirmed by outcompeting signal with recombinant secretory component. We observed that incubation of COVID-19 positive samples with recombinant secretory component prior to incubation in the experimental plate brought signal down to negative control levels in a concentration-dependent manner. Pre-pandemic colostrum showed no evidence of anti-Spike/RBD associated secretory component signal, as expected. Mann-Whitney U test was used to calculate significance between groups, where \*\*\*\*= $p < 0.0001$ .

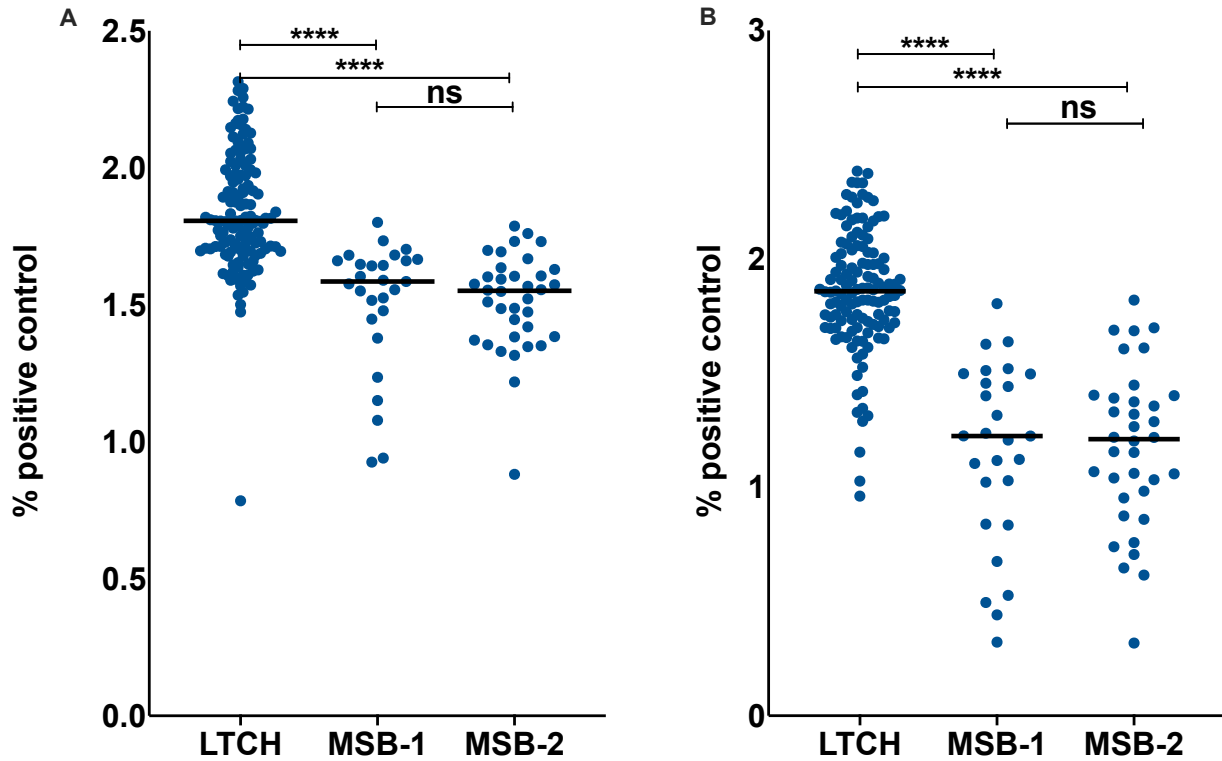

**Supplementary Figure 4. Comparison of anti-Spike/RBD IgG levels in the serum in the LTCH, MSB-1 and MSB-2 cohorts.**

(A, B) Subjects who received 2 doses of mRNA vaccines (LTCH, MSB-1) or 1 dose of ChAdOx1-S followed by a second dose of either BNT162b2 or mRNA1273 were sampled 2-4 weeks post-dose 2. Anti-spike and anti-RBD antibody levels were analyzed in serum via an ELISA-based method. We observed that subjects who received 2 doses of mRNA vaccines with doses 1 and 2 21-28 days apart (LTCH, n=93) had significantly higher levels of serum titres compared to subjects who received 2 doses of mRNA vaccines but doses 1 and 2 were 3 months apart (MSB-1, n=27). However, when comparing mRNA/mRNA (MSB-1) to Ad/mRNA (MSB-2, n=36) when both groups received delayed second doses, the difference in serum antibody titres was not significant. Spearman test was used to calculate the correlation coefficient for each plot, where \*\*\*\*= $p < 0.0001$ .

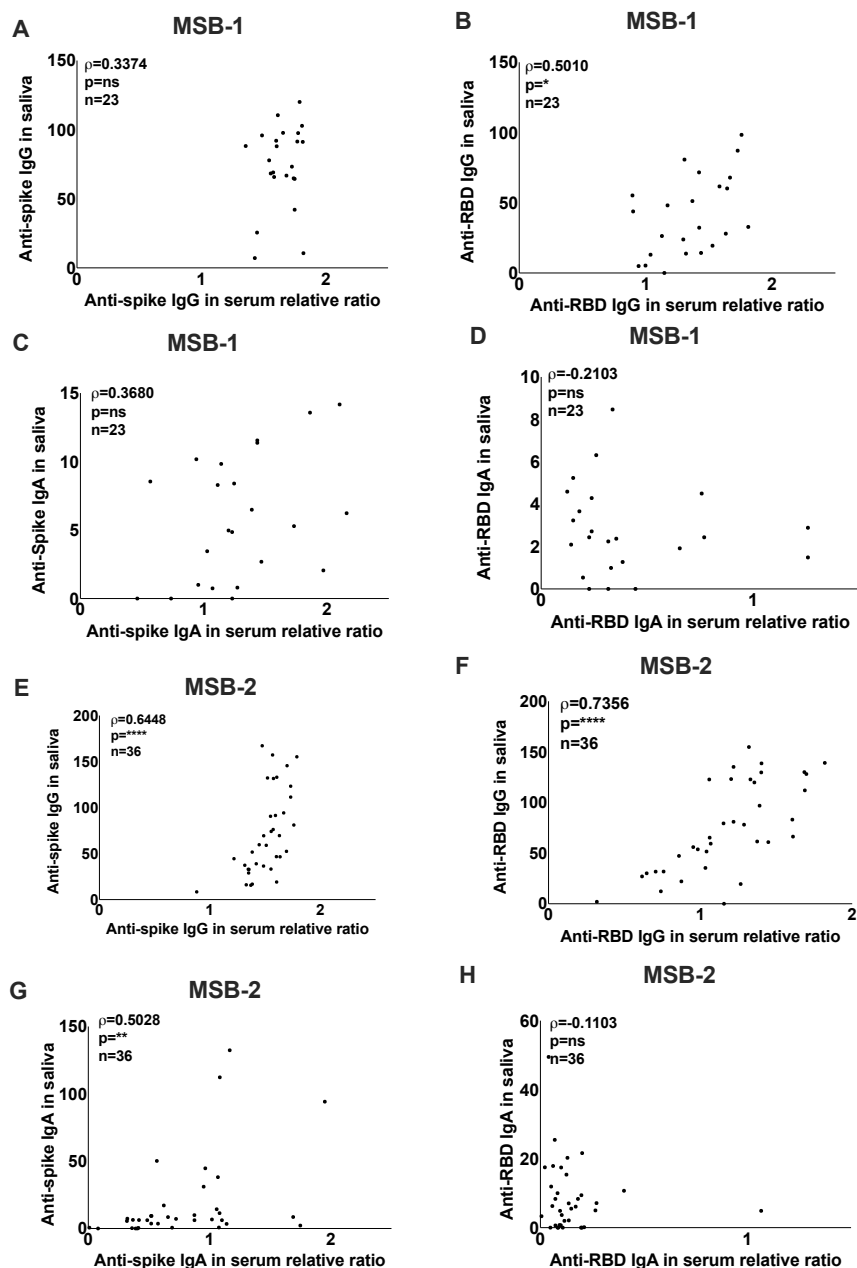

**Supplementary Figure 5. Correlation of anti-spike and anti-RBD antibodies in the saliva and serum after 2 vaccine doses**

Participants from either MSB-1 or MSB-2 cohorts were sampled 2-4 weeks after 2 doses of BNT162b2 (MSB-1) or 1 dose of ChAdOx1-S and a second dose of either BNT162b2 or mRNA1273 (MSB-2). IgA and IgG were analyzed in serum and saliva, and a Spearman test was used to calculate correlation coefficients. ns= not significant,  $*$ = $p<0.05$  and  $***$ = $p<0.001$ .

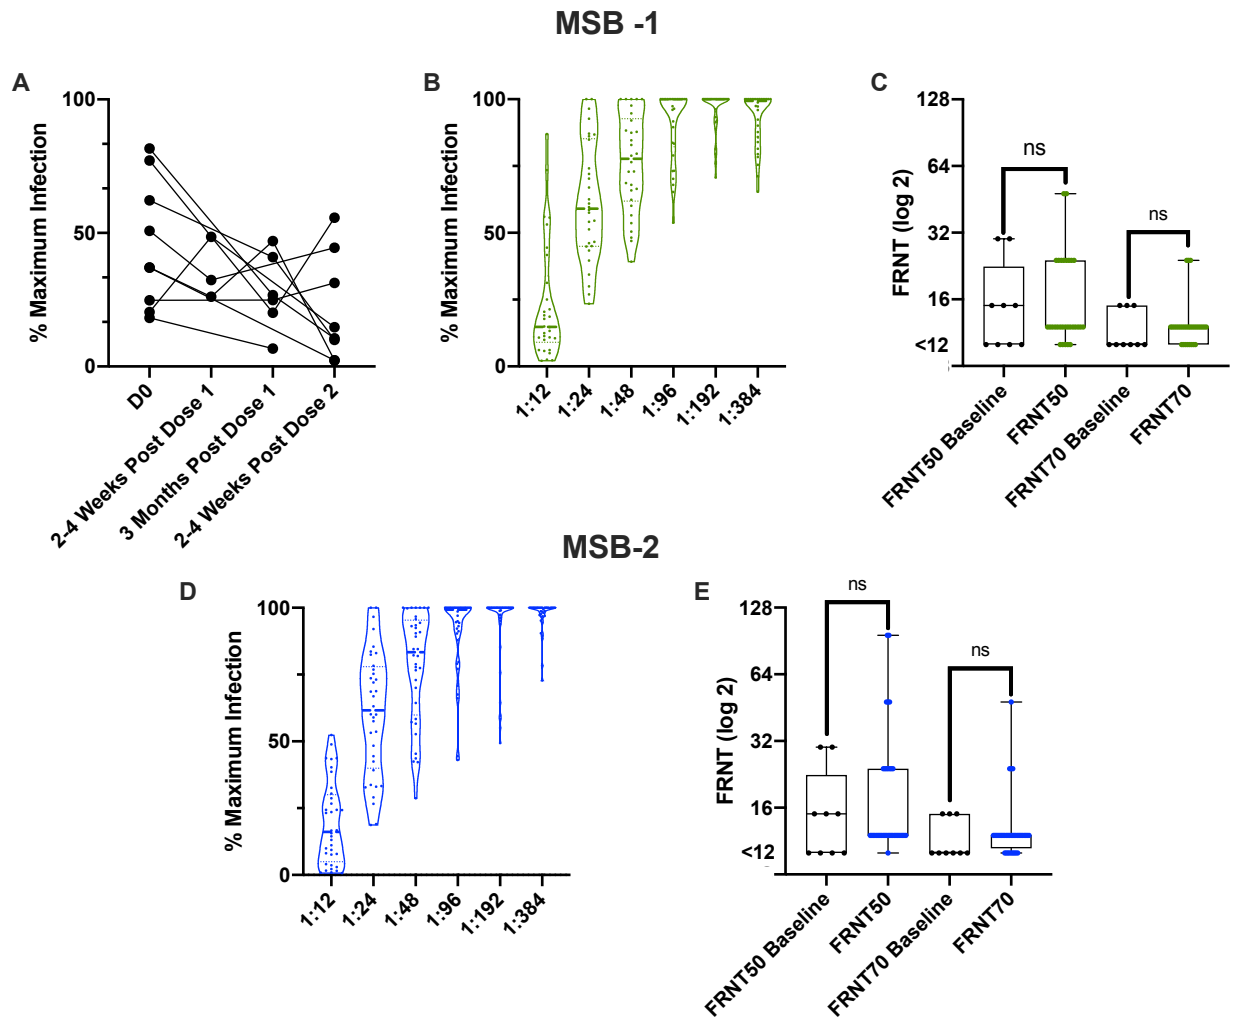

**Supplementary Figure 6. Neutralizing antibodies detected in the saliva of vaccinated subjects**

Saliva from MSB-1 (A,B,C) or MSB-2 (D,E) was assessed for the presence of neutralizing antibodies and results were expressed as a percentage of maximum infection, where a lower percentage indicates decreased infection of hACE-2 HEK293 cells by rVSV-eGFP-SARS-CoV-2-Spike. (A)- Longitudinal assessment of a subset of MSB-1 subjects (n=9). (B)- Neutralization potential at different dilutions of saliva from n=30 MSB-1 participants. (C)- Fluorescent reduction neutralization titre (FRNT) using a cut off of either 50% or 70% neutralization (FRNT50 and FRNT70, respectively) from n=30 MSB-1 participants. (D)- Neutralization potential at different dilutions of saliva from n=36 MSB-2 participants. (E)- Fluorescent reduction neutralization titre (FRNT) using a cut off of either 50% or 70% neutralization (FRNT50 and FRNT70, respectively) from n=36 MSB-2 participants. Mann-Whitney U test was used to calculate significance between groups, where ns=not significant.

**SupplementaryTable 1. LTCH cohort (mRNA/mRNA)**

| <b>Participant ID</b> | <b>Age</b> | <b>Sex</b> | <b>Vaccine type</b> | <b>Interval between dose 1 and dose 2 (weeks)</b> |
|-----------------------|------------|------------|---------------------|---------------------------------------------------|
| 1                     | 46-50      | F          | mRNA1273            | 4.0                                               |
| 2                     | 61-65      | F          | mRNA1273            | 4.7                                               |
| 3                     | 46-50      | F          | BNT162b2            | 5.9                                               |
| 4                     | 41-45      | F          | mRNA1273            | 4.0                                               |
| 5                     | 56-60      | F          | BNT162b2            | 3.0                                               |
| 6                     | 41-45      | F          | mRNA1273            | 4.0                                               |
| 7                     | 56-60      | F          | mRNA1273            | 4.0                                               |
| 8                     | 41-45      | F          | BNT162b2            | 5.0                                               |
| 9                     | 56-60      | F          | mRNA1273            | 4.0                                               |
| 10                    | 46-50      | F          | mRNA1273            | 4.0                                               |
| 11                    | 36-40      | F          | BNT162b2            | 5.0                                               |
| 12                    | 51-55      | M          | BNT162b2            | 2.9                                               |
| 13                    | 56-60      | F          | mRNA1273            | 2.9                                               |
| 14                    | 46-50      | F          | BNT162b2            | 5.6                                               |
| 15                    | 31-35      | F          | BNT162b2            | 5.3                                               |
| 16                    | 51-55      | F          | BNT162b2            | 5.6                                               |
| 17                    | 61-65      | F          | BNT162b2            | 47.7                                              |
| 18                    | 51-55      | F          | BNT162b2            | 4.4                                               |
| 19                    | 51-55      | F          | mRNA1273            | 4.0                                               |
| 20                    | 61-65      | F          | BNT162b2            | 5.0                                               |
| 21                    | 56-60      | F          | BNT162b2            | 5.0                                               |
| 22                    | 26-30      | F          | BNT162b2            | 5.6                                               |
| 23                    | 56-60      | F          | BNT162b2            | 5.6                                               |
| 24                    | 46-50      | F          | BNT162b2            | 5.6                                               |
| 25                    | 41-45      | F          | BNT162b2            | 5.6                                               |
| 26                    | 36-40      | F          | BNT162b2            | 5.6                                               |
| 27                    | 61-65      | F          | BNT162b2            | 5.6                                               |
| 28                    | 51-55      | F          | BNT162b2            | 5.6                                               |
| 29                    | 41-45      | F          | BNT162b2            | 5.6                                               |
| 30                    | 51-55      | M          | BNT162b2            | 7.0                                               |
| 31                    | 61-65      | F          | BNT162b2            | 5.6                                               |
| 32                    | 46-50      | F          | BNT162b2            | 5.0                                               |
| 33                    | 26-30      | F          | BNT162b2            | 5.6                                               |
| 34                    | 31-35      | M          | BNT162b2            | 5.6                                               |
| 35                    | 36-40      | F          | mRNA1273            | 4.0                                               |
| 36                    | 31-35      | F          | BNT162b2            | 5.0                                               |
| 37                    | 41-45      | F          | BNT162b2            | 5.6                                               |
| 38                    | 26-30      | F          | BNT162b2            | 5.6                                               |
| 39                    | 41-45      | F          | BNT162b2            | 5.0                                               |
| 40                    | 61-65      | F          | BNT162b2            | 6.4                                               |
| 41                    | 36-40      | M          | BNT162b2            | 5.6                                               |
| 42                    | 31-35      | F          | mRNA1273            | 4.0                                               |
| 43                    | 36-40      | M          | mRNA1273            | 4.0                                               |

|    |       |   |          |     |
|----|-------|---|----------|-----|
| 44 | 51-55 | F | mRNA1273 | 3.0 |
| 45 | 46-50 | M | mRNA1273 | 4.0 |
| 46 | 26-3- | F | mRNA1273 | 4.0 |
| 47 | 56-60 | F | mRNA1273 | 4.0 |
| 48 | 31-35 | F | mRNA1273 | 5.0 |
| 49 | 56-60 | M | mRNA1273 | 4.9 |
| 50 | 51-55 | F | mRNA1273 | 5.0 |
| 51 | 41-45 | F | mRNA1273 | 4.1 |
| 52 | 51-55 | F | mRNA1273 | 2.9 |
| 53 | 36-40 | F | BNT162b2 | 4.6 |
| 54 | 41-45 | F | BNT162b2 | 4.1 |
| 55 | 61-65 | F | BNT162b2 | 3.4 |
| 56 | 61-65 | F | BNT162b2 | 4.6 |
| 57 | 20-25 |   | BNT162b2 | 3.7 |
| 58 | 20-25 | F | BNT162b2 | 4.9 |
| 59 | 31-35 | F | BNT162b2 | 3.0 |
| 60 | 26-30 | F | BNT162b2 | 4.4 |
| 61 | 31-35 | F | BNT162b2 | 3.7 |
| 62 | 46-50 | F | BNT162b2 | 4.9 |
| 63 | 36-40 | M | BNT162b2 | 3.0 |
| 64 | 61-65 | M | BNT162b2 | 4.6 |
| 65 | 46-50 | F | BNT162b2 | 3.1 |
| 66 | 61-65 | F | BNT162b2 | 5.0 |
| 67 | 26-30 | F | BNT162b2 | 4.7 |
| 68 | 51-55 | F | BNT162b2 | 4.4 |
| 69 | 46-50 | F | BNT162b2 | 3.0 |
| 70 | 41-45 | F | BNT162b2 | 3.9 |
| 71 | 51-55 | F | BNT162b2 | 3.9 |
| 72 | 31-35 | F | BNT162b2 | 8.4 |
| 73 | 46-50 | F | BNT162b2 | 6.9 |
| 74 | 51-55 | F | BNT162b2 | 3.0 |
| 75 | 20-25 | F | BNT162b2 | 3.1 |
| 76 | 20-25 |   | BNT162b2 | 3.7 |
| 77 | 51-55 | F | BNT162b2 | 3.0 |
| 78 | 56-60 | F | BNT162b2 | 4.7 |
| 79 | 20-25 | F | BNT162b2 | 3.1 |
| 80 | 55-60 | F | BNT162b2 | 5.1 |
| 81 | 36-40 | M | BNT162b2 | 5.0 |
| 82 | 26-30 | F | BNT162b2 | 5.0 |
| 83 | 56-60 | F | BNT162b2 | 4.0 |
| 84 | 20-25 | F | mRNA1273 | 4.0 |
| 85 | 20-25 | F | BNT162b2 | 5.0 |
| 86 | 46-50 | M | mRNA1273 | 3.4 |
| 87 | 41-45 | F | BNT162b2 | 5.0 |
| 88 | 66-70 | F | BNT162b2 | 5.0 |
| 89 | 36-40 | M | mRNA1273 | 3.0 |
| 90 | 31-35 | F | BNT162b2 | 3.0 |
| 91 | 31-35 | F | mRNA1273 | 3.4 |
| 92 | 20-25 | F | BNT162b2 | 3.0 |
| 93 | 26-30 | F | mRNA1273 | 3.0 |
| 94 | 20-25 | F | BNT162b2 | 3.0 |
| 95 | 41-45 | F | BNT162b2 | 3.0 |
| 96 | 61-65 | F | mRNA1273 | 3.0 |



|                |                  |                        |                                      |                   |
|----------------|------------------|------------------------|--------------------------------------|-------------------|
| 97             | 56-60            | F                      | mRNA1273                             | 4.0               |
| 98             | 41-45            | F                      | BNT162b2                             | 49.1              |
| 99             | 26-30            | F                      | BNT162b2                             | 49.1              |
| 100            | 56-60            | F                      | mRNA1273                             | 3.0               |
| 101            | 26-30            | F                      | mRNA1273                             | 4.0               |
| 102            | 36-40            | F                      | BNT162b2                             | 3.0               |
| 103            | 61-65            | F                      | mRNA1273                             | 3.6               |
| 104            | 36-40            | F                      | BNT162b2                             | 5.0               |
| 105            | 26-30            | F                      | mRNA1273                             | 3.4               |
| 106            | 20-25            | F                      | mRNA1273                             | 4.0               |
| 107            | 71-75            | F                      | mRNA1273                             |                   |
| <b>Summary</b> | <b>Median=46</b> | <b>%M=11<br/>%F=89</b> | <b>%mRNA1273=32<br/>%BNT162b2=68</b> | <b>Median=4.4</b> |

**Supplementary Table 2a. COVID-19 negative controls**

| <b>Participant ID</b> | <b>Age</b>           | <b>Sex</b>             | <b>Collection period</b> | <b>Used in Fig 1, Supp Fig 3 or as pooled negative</b> |
|-----------------------|----------------------|------------------------|--------------------------|--------------------------------------------------------|
| 108                   | 26-30                | M                      | COVID era                | Supp Fig 3                                             |
| 109                   | 20-25                | F                      | COVID era                | Supp Fig 3                                             |
| 110                   | 61-65                | M                      | COVID era                | Supp Fig 3                                             |
| 111                   | 36-40                | M                      | COVID era                | Supp Fig 3                                             |
| 112                   | 56-6-                | F                      | COVID era                | Supp Fig 3                                             |
| 113                   | 41-45                | M                      | COVID era                | Supp Fig 3                                             |
| 114                   | 46-50                | F                      | COVID era                | Supp Fig 3                                             |
| 115                   | 26-30                | M                      | COVID era                | Supp Fig 3                                             |
| 116                   | 31-35                | F                      | COVID era                | Supp Fig 3                                             |
| 117                   | 31-35                | M                      | COVID era                | Supp Fig 3                                             |
| 118                   | 36-40                | F                      | COVID era                | Supp Fig 3                                             |
| 119                   | 36-40                | M                      | COVID era                | Supp Fig 3                                             |
| 120                   | 31-35                | M                      | COVID era                | Supp Fig 3                                             |
| 121                   | 36-40                | M                      | COVID era                | Supp Fig 3                                             |
| 122                   | 66-70                | F                      | COVID era                | Supp Fig 3                                             |
| 123                   | 66-70                | M                      | COVID era                | Supp Fig 3                                             |
| 124                   | 91-95                | F                      | COVID era                | Supp Fig 3                                             |
| 125                   | 36-40                | M                      | COVID era                | Supp Fig 3                                             |
| 126                   | 71-75                | F                      | COVID era                | Supp Fig 3                                             |
| 127                   | 66-70                | M                      | COVID era                | Supp Fig 3                                             |
| 128                   | 36-40                | F                      | COVID era                | Supp Fig 3                                             |
| 129                   | 41-45                | M                      | COVID era                | Supp Fig 3                                             |
| 130                   | 41-45                | M                      | COVID era                | Supp Fig 3                                             |
| 131                   | 51-55                | M                      | COVID era                | Supp Fig 3                                             |
| 132                   | 61-65                | M                      | COVID era                | Supp Fig 3                                             |
| 133                   | 56-60                | F                      | COVID era                | Supp Fig 3                                             |
| 134                   | 61-65                | M                      | COVID era                | Supp Fig 3                                             |
| 135                   | 71-75                | M                      | COVID era                | Supp Fig 3                                             |
| 136                   | 81-85                | F                      | COVID era                | Supp Fig 3                                             |
| 137                   | 51-55                | M                      | COVID era                | Supp Fig 3                                             |
| 138                   | 71-75                | M                      | COVID era                | Supp Fig 3                                             |
| 139                   | 61-65                | F                      | COVID era                | Supp Fig 3                                             |
| 140                   | 61-65                | M                      | COVID era                | Supp Fig 3                                             |
| 141                   | 81-85                | F                      | COVID era                | Supp Fig 3                                             |
| 142                   | 46-50                | M                      | COVID era                | Supp Fig 3                                             |
| 143                   | 66-70                | F                      | COVID era                | Supp Fig 3                                             |
| 144                   | 20-25                | F                      | COVID era                | Supp Fig 3                                             |
| 145                   | 66-70                | F                      | COVID era                | Supp Fig 3                                             |
| 146                   | 26-30                | M                      | COVID era                | Supp Fig 3                                             |
| 147                   | 61-65                | F                      | COVID era                | Supp Fig 3                                             |
| 148                   | 61-65                | M                      | COVID era                | Supp Fig 3                                             |
| 149                   | 41-45                | M                      | COVID era                | Supp Fig 3                                             |
| 150                   | 61-65                | M                      | COVID era                | Supp Fig 3                                             |
| 151                   | 86-90                | M                      | COVID era                | Supp Fig 3                                             |
| 152                   | 81-85                | F                      | COVID era                | Supp Fig 3                                             |
| 153                   | 81-85                | M                      | COVID era                | Supp Fig 3                                             |
| 154                   | 76-80                | M                      | COVID era                | Supp Fig 3                                             |
| 155                   | 56-60                | M                      | COVID era                | Supp Fig 3                                             |
| 156                   | 56-60                | M                      | COVID era                | Supp Fig 3                                             |
| <b>Summary</b>        | <b>Median age=58</b> | <b>%M=63<br/>%F=37</b> |                          |                                                        |

**Supplementary Table 2b.** Pre-COVID era negative controls

| <b>Sample ID</b> | <b>Age</b> | <b>Sex</b> | <b>Used in Supp Fig 3 or as pooled negative</b> |
|------------------|------------|------------|-------------------------------------------------|
| 157              | 31-35      | F          | Pooled negative                                 |
| 158              | 41-45      | F          | Pooled negative                                 |
| 159              | 41-45      | M          | Pooled negative                                 |
| 160              | 31-35      | F          | Pooled negative                                 |
| 161              | 66-70      | M          | Pooled negative                                 |
| 162              | 20-25      | F          | Pooled negative                                 |
| 163              | 31-35      | F          | Pooled negative                                 |
| 164              | 26-30      | F          | Pooled negative                                 |
| 165              | 41-45      | F          | Pooled negative                                 |
| 166              | 31-35      | M          | Pooled negative                                 |
| 167              | 26-30      | M          | Pooled negative                                 |
| 168              | 41-45      | F          | Pooled negative                                 |
| 169              | 46-50      | F          | Pooled negative                                 |
| 170              | 36-40      | F          | Pooled negative                                 |
| 171              | 56-60      | M          | Pooled negative                                 |
| 172              | 36-40      | M          | Pooled negative                                 |
| 173              | 51-55      | F          | Pooled negative                                 |
| 174              | 15-19      | M          | Pooled negative                                 |
| 175              | 20-25      | M          | Pooled negative                                 |
| 176              | 46-50      | M          | Pooled negative                                 |
| 177              | 36-40      | F          | Pooled negative                                 |
| 178              | 36-40      | F          | Pooled negative                                 |
| 179              | 46-50      | F          | Pooled negative                                 |
| 180              | 41-45      | F          | Pooled negative                                 |
| 181              | 46-50      | M          | Pooled negative                                 |
| 182              | 51-55      | F          | Pooled negative                                 |
| 183              | 31-35      | M          | Pooled negative                                 |
| 184              | 31-35      | F          | Pooled negative                                 |
| 185              | 56-60      | F          | Pooled negative                                 |
| 186              | 51-55      | F          | Pooled negative                                 |
| 187              | 26-30      | F          | Pooled negative                                 |
| 188              | 36-40      | M          | Pooled negative                                 |
| 189              | 41-45      | M          | Pooled negative                                 |
| 190              | 31-35      | F          | Pooled negative                                 |
| 191              | 26-30      | F          | Pooled negative                                 |
| 192              | 36-40      | F          | Pooled negative                                 |
| 193              | 56-60      | M          | Pooled negative                                 |
| 194              | 41-45      | M          | Pooled negative                                 |
| 195              | 41-45      | F          | Pooled negative                                 |
| 196              | 36-40      | F          | Pooled negative                                 |
| 197              | 31-35      | M          | Pooled negative                                 |
| 198              | 36-40      | M          | Pooled negative                                 |
| 199              | 46-50      | F          | Pooled negative                                 |
| 200              | 41-45      | F          | Pooled negative                                 |
| 201              | 15-19      | F          | Pooled negative                                 |
| 202              | 26-30      | F          | Pooled negative                                 |
| 203              | 21-25      | M          | Pooled negative                                 |
| 204              | 36-40      | F          | Pooled negative                                 |

|                |                      |                        |                              |
|----------------|----------------------|------------------------|------------------------------|
| 205            | 36-40                | M                      | Pooled negative              |
| 206            | 31-35                | F                      | Pooled negative              |
| 207            | 26-30                | F                      | Pooled negative              |
| 208            | 31-35                | M                      | Supp Fig 3 + pooled negative |
| 209            | 32-35                | M                      | Supp Fig 3 + pooled negative |
| 210            | 41-45                | M                      | Supp Fig 3 + pooled negative |
| 211            | 51-55                | F                      | Supp Fig 3 + pooled negative |
| 212            | 56-60                | M                      | Supp Fig 3 + pooled negative |
| 213            | 56-60                | F                      | Supp Fig 3 + pooled negative |
| 214            | 46-50                | F                      | Supp Fig 3 + pooled negative |
| 215            | 41-45                | M                      | Supp Fig 3 + pooled negative |
| 216            | 41-45                | M                      | Supp Fig 3 + pooled negative |
| 217            | 36-40                | F                      | Supp Fig 3 + pooled negative |
| 218            | 46-50                | M                      | Supp Fig 3 + pooled negative |
| 219            | 41-45                | F                      | Supp Fig 3 + pooled negative |
| 220            | 51-55                | M                      | Supp Fig 3 + pooled negative |
| 221            | 41-45                | F                      | Supp Fig 3 + pooled negative |
| 222            | 26-30                | M                      | Supp Fig 3 + pooled negative |
| 223            | 41-45                | F                      | Supp Fig 3 + pooled negative |
| 224            | 26-30                | M                      | Supp Fig 3 + pooled negative |
| 225            | 31-35                | M                      | Supp Fig 3 + pooled negative |
| 226            | 36-40                | M                      | Supp Fig 3 + pooled negative |
| 227            | 41-45                | F                      | Supp Fig 3 + pooled negative |
| 228            | 36-40                | F                      | Supp Fig 3 + pooled negative |
| 229            | 15-19                | M                      | Supp Fig 3 + pooled negative |
| 230            | 20-25                | F                      | Supp Fig 3 + pooled negative |
| 231            | 46-50                | F                      | Supp Fig 3 + pooled negative |
| 232            | 56-60                | F                      | Supp Fig 3 + pooled negative |
| 233            | 61-65                | M                      | Supp Fig 3 + pooled negative |
| 234            | 36-40                | F                      | Supp Fig 3 + pooled negative |
| <b>Summary</b> | <b>Median age=39</b> | <b>%M=42<br/>%F=58</b> |                              |

**Supplementary Table 2c. COVID-19 patient data**

| <b>Participant ID</b> | <b>Age</b> | <b>Sex</b> | <b>Days post symptom onset</b> | <b>Acute vs convalescent</b> | <b>Used in Fig 1, Supp Fig 3 or both</b> |
|-----------------------|------------|------------|--------------------------------|------------------------------|------------------------------------------|
| 235                   | 71-75      | M          | 46                             | Convalescent                 | Supp Fig3                                |
| 236                   | 31-35      | M          | 78                             | Convalescent                 | Supp Fig3                                |
| 237                   | 56-60      | M          | 47                             | Convalescent                 | Supp Fig3                                |
| 238                   | 71-75      | F          | 42                             | Convalescent                 | Supp Fig3                                |
| 239                   | 26-30      | M          | 50                             | Convalescent                 | Supp Fig3                                |
| 240                   | 51-55      | M          | 48                             | Convalescent                 | Supp Fig3                                |
| 241                   | 46-50      | M          | 60                             | Convalescent                 | Supp Fig3                                |
| 242                   | 41-45      | M          | 44                             | Convalescent                 | Supp Fig3                                |
| 243                   | 56-60      | F          | 45                             | Convalescent                 | Supp Fig3                                |
| 244                   | 56-60      | F          | 39                             | Convalescent                 | Supp Fig3                                |
| 245                   | 51-55      | M          | 65                             | Convalescent                 | Supp Fig3                                |
| 246                   | 41-45      | F          | 53                             | Convalescent                 | Supp Fig3                                |
| 247                   | 61-65      | F          | 51                             | Convalescent                 | Supp Fig3                                |
| 248                   | 56-60      | F          | 47                             | Convalescent                 | Supp Fig3                                |
| 249                   | 26-30      | M          | 42                             | Convalescent                 | Supp Fig3                                |
| 250                   | 41-45      | M          | 49                             | Convalescent                 | Supp Fig3                                |
| 251                   | 56-60      | M          | 39                             | Convalescent                 | Supp Fig3                                |
| 252                   | 56-60      | F          | 59                             | Convalescent                 | Supp Fig3                                |
| 253                   | 76-80      | M          | 64                             | Convalescent                 | Supp Fig3                                |
| 254                   | 51-55      | M          | 58                             | Convalescent                 | Supp Fig3                                |
| 255                   | 71-75      | M          | 57                             | Convalescent                 | Supp Fig3                                |
| 256                   | 56-60      | F          | 58                             | Convalescent                 | Supp Fig3                                |
| 257                   | 61-65      | M          | 40                             | Convalescent                 | Supp Fig3                                |
| 258                   | 51-55      | M          | 64                             | Convalescent                 | Supp Fig3                                |
| 259                   | 26-30      | F          | 91                             | Convalescent                 | Supp Fig3                                |
| 260                   | 51-55      | M          | 49                             | Convalescent                 | Supp Fig3                                |
| 261                   | 66-70      | F          | 65                             | Convalescent                 | Supp Fig3                                |
| 262                   | 51-55      | F          | 52                             | Convalescent                 | Supp Fig3                                |
| 263                   | 51-55      | M          | 82                             | Convalescent                 | Both                                     |
| 264                   | 51-55      | M          | 75                             | Convalescent                 | Supp Fig3                                |
| 265                   | 26-30      | F          | 56                             | Convalescent                 | Supp Fig3                                |
| 266                   | 61-65      | M          | 31                             | Convalescent                 | Supp Fig3                                |
| 267                   | 76-80      | F          | 47                             | Convalescent                 | Supp Fig3                                |
| 268                   | 66-70      | F          | 40                             | Convalescent                 | Supp Fig3                                |
| 269                   | 46-50      | M          | 50                             | Convalescent                 | Supp Fig3                                |
| 270                   | 81-85      | F          | 67                             | Convalescent                 | Supp Fig3                                |
| 271                   | 61-65      | M          | 62                             | Convalescent                 | Supp Fig3                                |
| 272                   | 71-75      | M          | 80                             | Convalescent                 | Supp Fig3                                |
| 273                   | 56-60      | M          | 104                            | Convalescent                 | Supp Fig3                                |
| 274                   | 71-75      | M          | 40                             | Convalescent                 | Supp Fig3                                |
| 275                   | 81-85      | M          | 17                             | Acute                        | Supp Fig3                                |
| 276                   | 41-45      | M          | 44                             | Convalescent                 | Supp Fig3                                |
| 277                   | 81-85      | M          | 13                             | Acute                        | Supp Fig3                                |
| 278                   | 36-40      | F          | 51                             | Convalescent                 | Supp Fig3                                |
| 279                   | 61-70      | F          | 53                             | Convalescent                 | Supp Fig3                                |
| 280                   | 36-40      | M          | 45                             | Convalescent                 | Both                                     |
| 281                   | 51-55      | M          | 52                             | Convalescent                 | Both                                     |
| 282                   | 46-50      | M          | 9                              | Acute                        | Both                                     |
| 283                   | 61-65      | M          | 10                             | Acute                        | Both                                     |
| 284                   | 56-60      | M          | 69                             | Convalescent                 | Both                                     |

|                |                           |                        |                                                                      |                                       |            |
|----------------|---------------------------|------------------------|----------------------------------------------------------------------|---------------------------------------|------------|
| 285            | 41-45                     | M                      | 24                                                                   | Convalescent                          | Both       |
| 286            | 81-85                     | F                      | 11                                                                   | Acute                                 | Both       |
| 287            | 81-85                     | F                      | 14                                                                   | Acute                                 | Both       |
| 288            | 81-85                     | M                      | 5                                                                    | Acute                                 | Both       |
| 289            | 86-49                     | M                      | 12                                                                   | Acute                                 | Supp Fig 3 |
| 290            | 91-95                     | F                      | 10                                                                   | Acute                                 | Supp Fig 3 |
| 291            | 76-80                     | M                      | 7                                                                    | Acute                                 | Supp Fig 3 |
| 292            | 76-80                     | M                      | 10                                                                   | Acute                                 | Supp Fig3  |
| 293            | 46-50                     | M                      | 13                                                                   | Acute                                 | Supp Fig3  |
| 294            | 56-60                     | M                      | 8                                                                    | Acute                                 | Supp Fig3  |
| 295            | 56-60                     | M                      | 11                                                                   | Acute                                 | Supp Fig3  |
| 296            | 56-60                     | F                      | 11                                                                   | Acute                                 | Supp Fig3  |
| 297            | 96-100                    | F                      | 3                                                                    | Acute                                 | Supp Fig3  |
| 298            | 96-100                    | F                      | 6                                                                    | Acute                                 | Supp Fig3  |
| 299            | 61-65                     | M                      | 15                                                                   | Acute                                 | Supp Fig3  |
| 280            | 36-40                     | M                      | 19                                                                   | Acute                                 | Supp Fig3  |
| 281            | 61-65                     | F                      | 3                                                                    | Acute                                 | Supp Fig3  |
| 282            | 81-85                     | F                      | 12                                                                   | Acute                                 | Supp Fig3  |
| 283            | 61-65                     | F                      | 9                                                                    | Acute                                 | Supp Fig3  |
| 284            | 66-70                     | M                      | 36                                                                   | Convalescent                          | Supp Fig3  |
| 285            | 31-35                     | F                      | 40                                                                   | Convalescent                          | Supp Fig3  |
| 286            | 31-25                     | F                      | 75                                                                   | Convalescent                          | Both       |
| 287            | 41-35                     | M                      | 86                                                                   | Convalescent                          | Both       |
| 288            | 71-75                     | F                      | 96                                                                   | Convalescent                          | Both       |
| 289            |                           |                        |                                                                      | Acute                                 | Fig 1      |
| 290            |                           |                        |                                                                      | Acute                                 | Fig 1      |
| 291            |                           |                        |                                                                      | Acute                                 | Fig 1      |
| 292            |                           |                        |                                                                      | Acute                                 | Fig 1      |
| <b>Summary</b> | <b>Median age<br/>=59</b> | <b>%M=61<br/>%F=39</b> | <b>Average<br/>number of<br/>days post-<br/>symptom<br/>onset=42</b> | <b>%Acute=32<br/>%Convalescent=68</b> |            |

**Supplementary Table 3a. Bivariate and multivariable analysis examining potential independent associations between log-transformed saliva anti-Spike IgA.**

|                                                    | Bivariate analysis        | Multivariable analysis    |
|----------------------------------------------------|---------------------------|---------------------------|
| Predictor                                          | Beta coefficient (95% CI) | Beta coefficient (95% CI) |
| Age in years                                       | 0.02 (0.01 to 0.04)       | 0.02 (0.002 to 0.04)      |
| Male sex                                           | -0.4 (-1.1 to 0.3)        | -0.4 (-1.1 to 0.3)        |
| Time from vaccination to sample collection in days | 0.01 (-0.03 to 0.05)      | 0.01 (-0.03 to 0.05)      |
| Prior SARS-CoV-2 infection                         | 1.0 (0.4 to 1.5)          | 0.9 (0.3 to 1.4)          |

**Supplementary Table 3b. Bivariate and multivariable analysis examining potential independent associations between saliva anti-Spike IgG.**

|                                            | Bivariate analysis        | Multivariable analysis    |
|--------------------------------------------|---------------------------|---------------------------|
| Predictor                                  | Beta coefficient (95% CI) | Beta coefficient (95% CI) |
| Age in years                               | 0.6 (-0.1 to 1.2)         | 0.4 (-0.2 to 1.1)         |
| Male sex                                   | -38.7 (-65.2 to -12.2)    | -39.5 (-65.7 to -13.3)    |
| Time from vaccination to sample collection | -0.9 (-4.7 to 2.8)        | -0.4 (-1.9 to 1.1)        |
| Prior SARS-CoV-2 infection                 | 21.3 (-0.3 to 42)         | 19.7 (-1.5 to 41)         |

**Supplementary Table 3c. Bivariate and multivariable analysis examining potential independent associations between log-transformed serum anti-RBD IgA.**

|                                            | Bivariate analysis        | Multivariable analysis    |
|--------------------------------------------|---------------------------|---------------------------|
| Predictor                                  | Beta coefficient (95% CI) | Beta coefficient (95% CI) |
| Age in years                               | 0.005 (-0.006 to 0.02)    | 0.0008 (-0.01 to 0.01)    |
| Male sex                                   | 0.2 (-0.2 to 0.7)         | 0.2 (-0.3 to 0.6)         |
| Time from vaccination to sample collection | -0.04 (-0.06 to -0.01)    | -0.04 (-0.06 to -0.01)    |
| Prior SARS-CoV-2 infection                 | 0.5 (0.1 to 0.9)          | 0.5 (0.2 to 0.9)          |

Abbreviations: CI = confidence interval

**Supplementary Table 4. MSB-1 (longitudinal mRNA 2 doses cohort)**

| <b>Participant ID</b> | <b>Age</b>           | <b>Sex</b>             | <b>Vaccination Type</b> |
|-----------------------|----------------------|------------------------|-------------------------|
| 293                   | 20-25                | F                      | BNT162b2                |
| 294                   | 26-30                | F                      | BNT162b2                |
| 295                   | 26-30                | M                      | BNT162b2                |
| 296                   | 20-25                | F                      | BNT162b2                |
| 297                   | 20-25                | M                      | BNT162b2                |
| 298                   | 20-25                | M                      | BNT162b2                |
| 299                   | 20-25                | M                      | BNT162b2                |
| 300                   | 41-45                | F                      | BNT162b2                |
| 301                   | 20-25                | M                      | BNT162b2                |
| 302                   | 20-25                | F                      | BNT162b2                |
| 303                   | 31-35                | F                      | BNT162b2                |
| 304                   | 36-40                | F                      | BNT162b2                |
| 305                   | 56-50                | M                      | BNT162b2                |
| 306                   | 56-60                | M                      | BNT162b2                |
| 307                   | 20-25                | F                      | BNT162b2                |
| 308                   | 36-40                | M                      | BNT162b2                |
| 309                   | 20-25                | F                      | BNT162b2                |
| 310                   | 20-25                | F                      | BNT162b2                |
| 311                   | 31-35                | M                      | BNT162b2                |
| 312                   | 26-30                | M                      | BNT162b2                |
| 313                   | 26-30                | F                      | BNT162b2                |
| 314                   | 26-30                | F                      | BNT162b2                |
| 315                   | 26-30                | F                      | BNT162b2                |
| 316                   | 20-25                | F                      | BNT162b2                |
| 317                   | 26-30                | M                      | BNT162b2                |
| 318                   | 46-50                | M                      | BNT162b2                |
| 319                   | 41-45                | F                      | BNT162b2                |
| 320                   | 41-45                | F                      | BNT162b2                |
| 321                   | 26-30                | F                      | BNT162b2                |
| 322                   | 26-30                | M                      | BNT162b2                |
| <b>Summary</b>        | <b>Median age=27</b> | <b>%M=42<br/>%F=56</b> |                         |



**Supplementary Table 5. MSB-2 cohort (ChAdOx1-S dose 1, mRNA dose 2)**

| <b>Participant ID</b> | <b>Age</b>              | <b>Sex</b>              | <b>Second vaccination type</b>       |
|-----------------------|-------------------------|-------------------------|--------------------------------------|
| 323                   | 56-60                   | F                       | BNT162b2                             |
| 324                   | 51-55                   | F                       | mRNA1273                             |
| 325                   | 36-40                   | F                       | mRNA1273                             |
| 326                   | 51-55                   | F                       | BNT162b2                             |
| 327                   | 46-50                   | F                       | BNT162b2                             |
| 328                   | 56-60                   | F                       | mRNA1273                             |
| 329                   | 56-60                   | F                       | mRNA1273                             |
| 330                   | 41-45                   | F                       | BNT162b2                             |
| 331                   | 46-50                   | F                       | BNT162b2                             |
| 332                   | 41-50                   | F                       | BNT162b2                             |
| 333                   | 71-75                   | M                       | BNT162b2                             |
| 334                   | 46-50                   | M                       | mRNA1273                             |
| 335                   | 46-50                   | M                       | BNT162b2                             |
| 336                   | 56-60                   | M                       | BNT162b2                             |
| 337                   | 41-45                   | F                       | BNT162b2                             |
| 338                   | 46-50                   | M                       | BNT162b2                             |
| 339                   | 41-45                   | M                       | BNT162b2                             |
| 340                   | 41-45                   | Other                   | BNT162b2                             |
| 341                   | 41-45                   | F                       | BNT162b2                             |
| 342                   | 56-60                   | F                       | BNT162b2                             |
| 343                   | 71-75                   | F                       | BNT162b2                             |
| 344                   | 61-65                   | M                       | BNT162b2                             |
| 345                   | 56-60                   | F                       | BNT162b2                             |
| 346                   | 61-65                   | F                       | BNT162b2                             |
| 347                   | 36-40                   | M                       | mRNA1273                             |
| 348                   | 51-55                   | M                       | mRNA1273                             |
| 349                   | 36-40                   | M                       | mRNA1273                             |
| 350                   | 56-60                   | F                       | BNT162b2                             |
| 351                   | 41-45                   | F                       | mRNA1273                             |
| 352                   | 66-70                   | F                       | mRNA1273                             |
| 353                   | 51-55                   | F                       | mRNA1273                             |
| 354                   | 61-65                   | M                       | BNT162b2                             |
| 355                   | 61-65                   | F                       | BNT162b2                             |
| 356                   | 61-65                   | M                       | BNT162b2                             |
| 357                   | 56-60                   | M                       | BNT162b2                             |
| 358                   | 46-50                   | F                       | mRNA1273                             |
| 359                   | 46-50                   | M                       | BNT162b2                             |
| 360                   | 41-45                   | F                       | BNT162b2                             |
| 361                   | 41-45                   | F                       | BNT162b2                             |
| 362                   | 56-60                   | F                       | BNT162b2                             |
| 363                   | 66-70                   | M                       | mRNA1273                             |
| <b>Summary</b>        | <b>Median Age= 52.5</b> | <b>%M=61<br/>%F= 39</b> | <b>%BNT162b2=68<br/>%mRNA1273=32</b> |
