# Supplementary material for: Systemic and mucosal IgA responses are variably induced in response to SARS-CoV-2 mRNA vaccination and are associated with protection against subsequent infection
Source: bioRxiv or medRxiv preprint supplement (doi:10.1101/2021.08.01.21261297), 2022-01-02
Supplement: Supplementary file [file media-1.pdf]

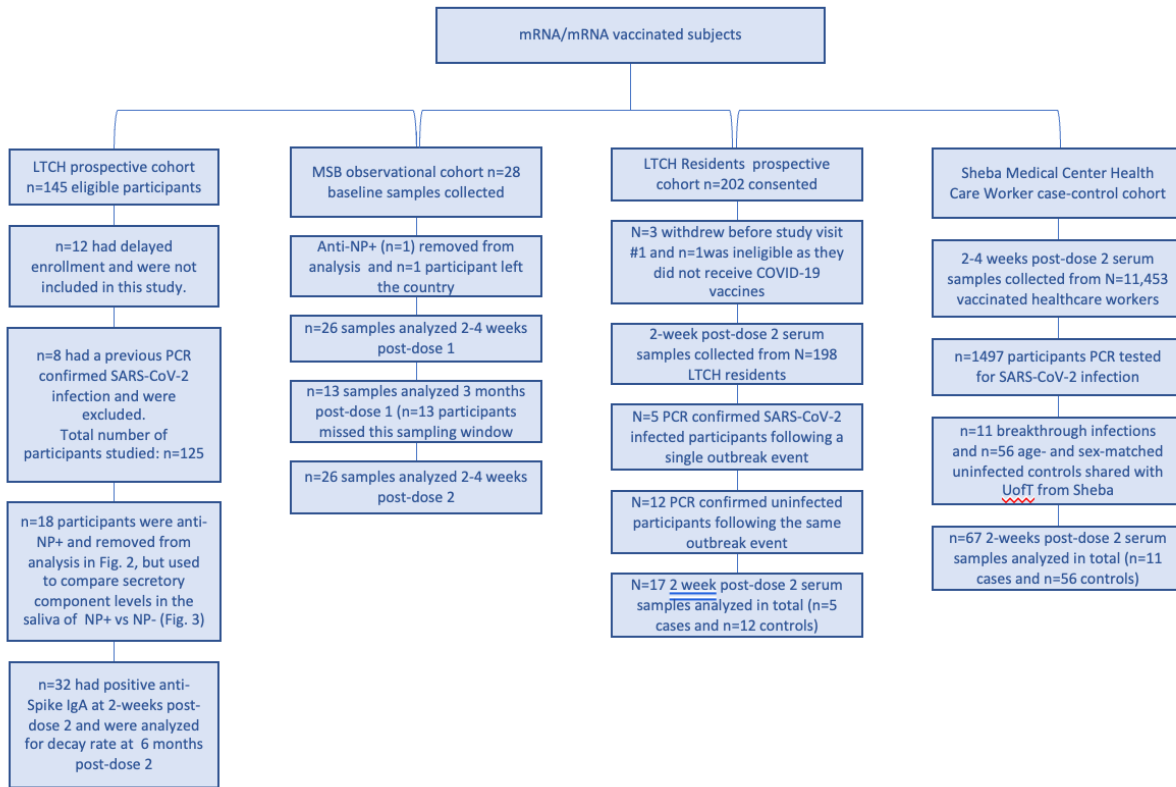

**Supplementary Fig. 1. Study Design**

Two observational cohorts (LTCH staff, MSB) a prospective cohort (LTCH Residents), and a case-control cohort (Sheba Medical Center HCW) were integrated into our overall study of mRNA/mRNA vaccinated subjects.

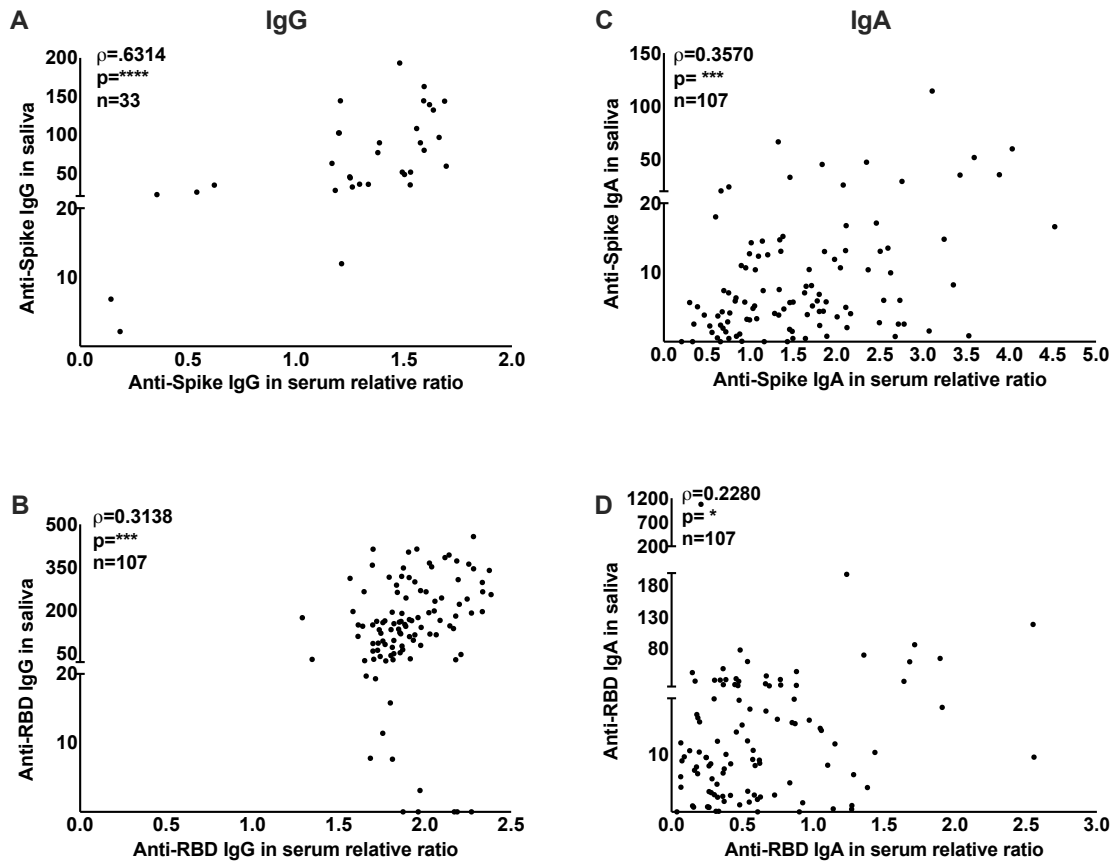

**Supplementary Fig. 2. Correlation of anti-spike and anti-RBD antibodies in the saliva and serum 2-4 weeks after mRNA vaccination**

Subjects from the LTCH cohort were sampled 2-4 weeks after their second dose of COVID-19 mRNA vaccination. Anti-Spike (A,C) and anti-RBD (B,D) IgG and IgA were analyzed in serum and saliva via an ELISA-based method. A Spearman test was used to calculate the correlation coefficient for each plot. During analysis of anti-Spike IgG (A) in the serum of LTCH subjects, we observed oversaturation of signal, and thus repeated the analysis for anti-Spike IgG using a lower concentration on a subset ( $n=33$ ) of samples which is what is shown here.  $*$ = $p<0.05$ ,  $***$ = $p<0.001$  and  $****$ = $p<0.0001$ .

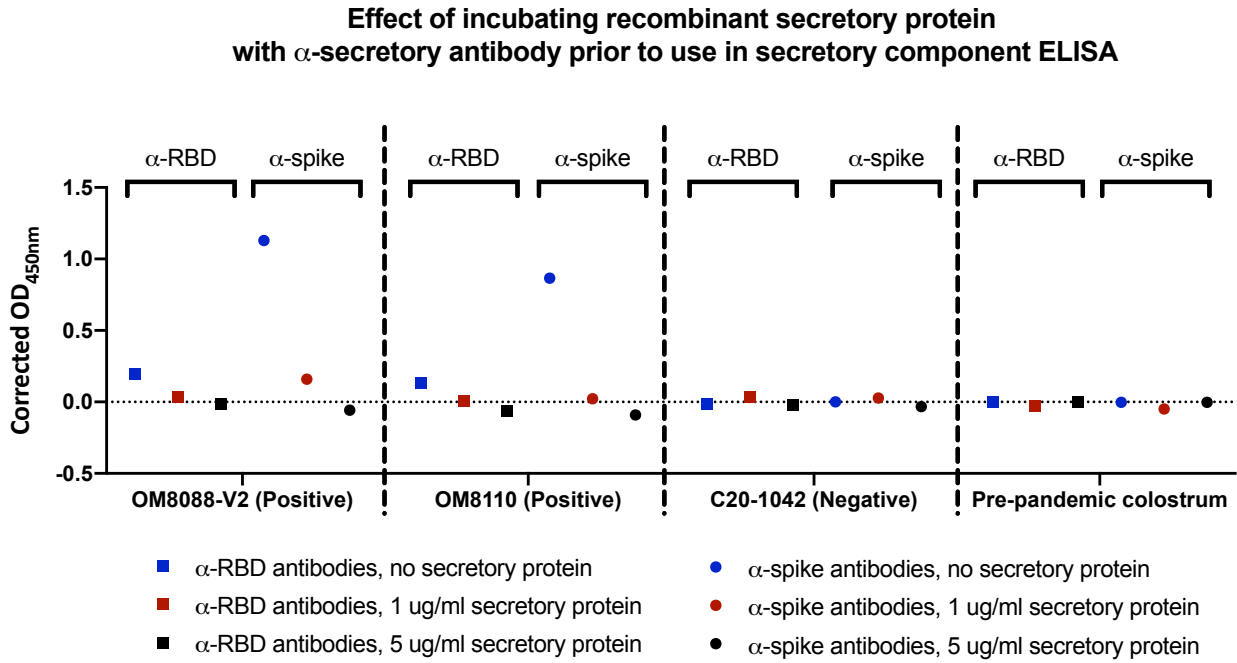

**Supplementary Fig. 3. Detection of secretory component associated with Spike/RBD-specific antibodies from COVID-19 patient saliva**

Validation of secretory component assay was confirmed by outcompeting signal with recombinant secretory component. We observed that incubation of COVID-19 positive samples with recombinant secretory component prior to incubation in the experimental plate brought signal down to negative control levels in a concentration-dependent manner. Pre-pandemic colostrum showed no evidence of anti-Spike/RBD associated secretory component signal, as expected.

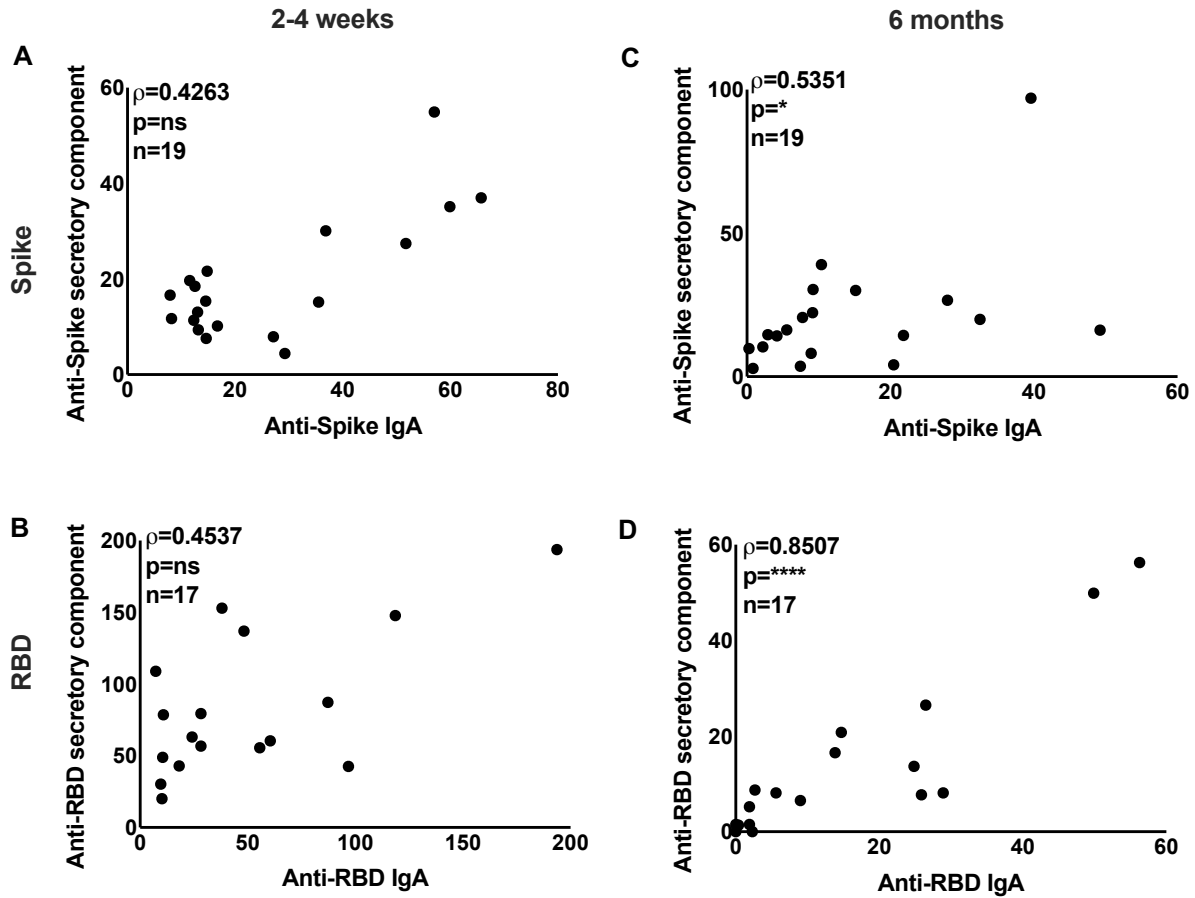

**Supplementary Fig. 4. Correlation of anti-spike and anti-RBD IgA and secretory component in the saliva at 2 weeks and 6 months post-dose 2.**

Participants from the LTCH cohort were sampled 2-4 weeks (A,B) and 6 months (C,D) after their second dose of COVID-19 mRNA vaccination. IgA and secretory component were analyzed in saliva via an ELISA-based method. A Spearman test was used to calculate the correlation coefficient for each plot, examining subjects who were positive for anti-Spike IgA at 2 weeks post-dose 2. ns= not significant,  $*=p<0.05$  and  $****=p<0.0001$ .

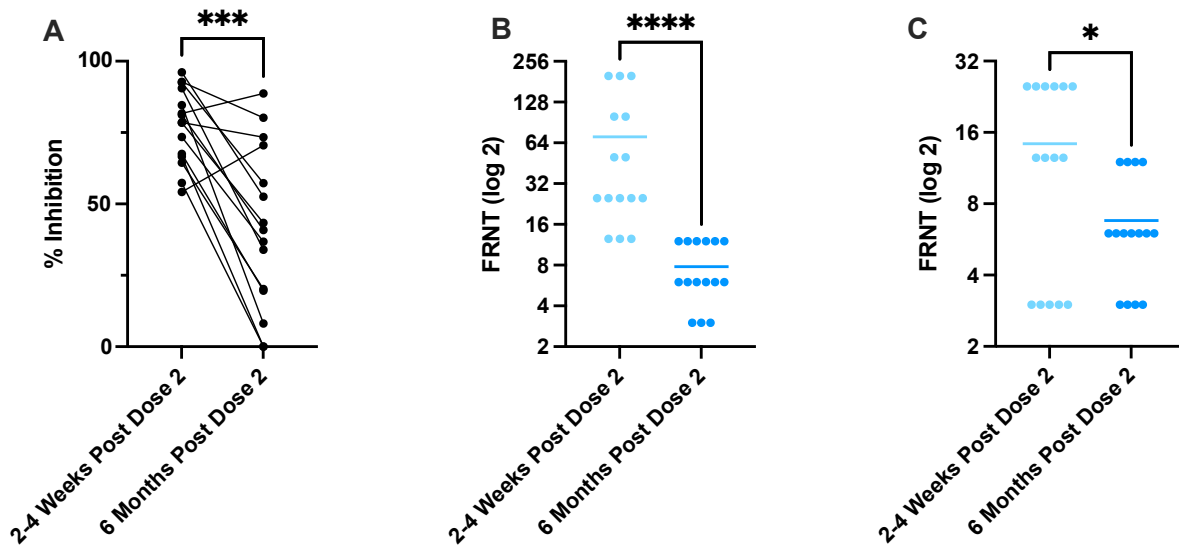

**Supplementary Fig 5. Neutralizing antibodies detected in the saliva of participants receiving COVID-19 mRNA vaccines.**

Saliva taken from a subset (n=15) of mRNA-vaccinated subjects representing a range of IgA titers 2-4 weeks post-dose 2 was assessed for the presence of neutralizing antibodies and results were expressed as a percentage of maximum infection (A), where a lower percentage indicates decreased infection of hACE-2 HEK293 cells by rVSV-eGFP-SARS-CoV-2-Spike. Fluorescent reduction neutralization titre (FRNT) using a cut off of either 50% (B) or 70% (C) from n=15 participants at 2-4 weeks and 6 months post-dose 2 was also analyzed. The Wilcoxon signed-rank test was used to calculate significance between groups, where  $*=p<0.05$ ,  $***=p<0.001$ , and  $****=p<0.0001$ .

**Supplementary Table 1.**

LTCH cohort (mRNA/mRNA)

| <b>Participant ID</b> | <b>Age</b> | <b>Sex</b> | <b>Vaccine type</b> | <b>Interval between dose 1 and dose 2 (weeks)</b> |
|-----------------------|------------|------------|---------------------|---------------------------------------------------|
| 1                     | 46-50      | F          | mRNA1273            | 4                                                 |
| 2                     | 61-65      | F          | mRNA1273            | 4.7                                               |
| 3                     | 46-50      | F          | BNT162b2            | 5.9                                               |
| 4                     | 41-45      | F          | mRNA1273            | 4                                                 |
| 5                     | 56-60      | F          | BNT162b2            | 3                                                 |
| 6                     | 41-45      | F          | mRNA1273            | 4                                                 |
| 7                     | 56-60      | F          | mRNA1273            | 4                                                 |
| 8                     | 41-45      | F          | BNT162b2            | 5                                                 |
| 9                     | 56-60      | F          | mRNA1273            | 4                                                 |
| 10                    | 46-50      | F          | mRNA1273            | 4                                                 |
| 11                    | 36-40      | F          | BNT162b2            | 5                                                 |
| 12                    | 51-55      | M          | BNT162b2            | 2.9                                               |
| 13                    | 56-60      | F          | mRNA1273            | 2.9                                               |
| 14                    | 46-50      | F          | BNT162b2            | 5.6                                               |
| 15                    | 31-35      | F          | BNT162b2            | 5.3                                               |
| 16                    | 51-55      | F          | BNT162b2            | 5.6                                               |
| 17                    | 61-65      | F          | BNT162b2            | 47.7                                              |
| 18                    | 51-55      | F          | BNT162b2            | 4.4                                               |
| 19                    | 51-55      | F          | mRNA1273            | 4                                                 |
| 20                    | 61-65      | F          | BNT162b2            | 5                                                 |
| 21                    | 56-60      | F          | BNT162b2            | 5                                                 |
| 22                    | 26-30      | F          | BNT162b2            | 5.6                                               |
| 23                    | 56-60      | F          | BNT162b2            | 5.6                                               |
| 24                    | 46-50      | F          | BNT162b2            | 5.6                                               |
| 25                    | 41-45      | F          | BNT162b2            | 5.6                                               |
| 26                    | 36-40      | F          | BNT162b2            | 5.6                                               |
| 27                    | 61-65      | F          | BNT162b2            | 5.6                                               |
| 28                    | 51-55      | F          | BNT162b2            | 5.6                                               |
| 29                    | 41-45      | F          | BNT162b2            | 5.6                                               |
| 30                    | 51-55      | M          | BNT162b2            | 7                                                 |
| 31                    | 61-65      | F          | BNT162b2            | 5.6                                               |
| 32                    | 46-50      | F          | BNT162b2            | 5                                                 |
| 33                    | 26-30      | F          | BNT162b2            | 5.6                                               |
| 34                    | 31-35      | M          | BNT162b2            | 5.6                                               |
| 35                    | 36-40      | F          | mRNA1273            | 4                                                 |
| 36                    | 31-35      | F          | BNT162b2            | 5                                                 |
| 37                    | 41-45      | F          | BNT162b2            | 5.6                                               |

|    |       |   |          |     |
|----|-------|---|----------|-----|
| 38 | 26-30 | F | BNT162b2 | 5.6 |
| 39 | 41-45 | F | BNT162b2 | 5   |
| 40 | 61-65 | F | BNT162b2 | 6.4 |
| 41 | 36-40 | M | BNT162b2 | 5.6 |
| 42 | 31-35 | F | mRNA1273 | 4   |
| 43 | 36-40 | M | mRNA1273 | 4   |
| 44 | 51-55 | F | mRNA1273 | 3   |
| 45 | 46-50 | M | mRNA1273 | 4   |
| 46 | 26-3- | F | mRNA1273 | 4   |
| 47 | 56-60 | F | mRNA1273 | 4   |
| 48 | 31-35 | F | mRNA1273 | 5   |
| 49 | 56-60 | M | mRNA1273 | 4.9 |
| 50 | 51-55 | F | mRNA1273 | 5   |
| 51 | 41-45 | F | mRNA1273 | 4.1 |
| 52 | 51-55 | F | mRNA1273 | 2.9 |
| 53 | 36-40 | F | BNT162b2 | 4.6 |
| 54 | 41-45 | F | BNT162b2 | 4.1 |
| 55 | 61-65 | F | BNT162b2 | 3.4 |
| 56 | 61-65 | F | BNT162b2 | 4.6 |
| 57 | 20-25 |   | BNT162b2 | 3.7 |
| 58 | 20-25 | F | BNT162b2 | 4.9 |
| 59 | 31-35 | F | BNT162b2 | 3   |
| 60 | 26-30 | F | BNT162b2 | 4.4 |
| 61 | 31-35 | F | BNT162b2 | 3.7 |
| 62 | 46-50 | F | BNT162b2 | 4.9 |
| 63 | 36-40 | M | BNT162b2 | 3   |
| 64 | 61-65 | M | BNT162b2 | 4.6 |
| 65 | 46-50 | F | BNT162b2 | 3.1 |
| 66 | 61-65 | F | BNT162b2 | 5   |
| 67 | 26-30 | F | BNT162b2 | 4.7 |
| 68 | 51-55 | F | BNT162b2 | 4.4 |
| 69 | 46-50 | F | BNT162b2 | 3   |
| 70 | 41-45 | F | BNT162b2 | 3.9 |
| 71 | 51-55 | F | BNT162b2 | 3.9 |
| 72 | 31-35 | F | BNT162b2 | 8.4 |
| 73 | 46-50 | F | BNT162b2 | 6.9 |
| 74 | 51-55 | F | BNT162b2 | 3   |
| 75 | 20-25 | F | BNT162b2 | 3.1 |
| 76 | 20-25 |   | BNT162b2 | 3.7 |
| 77 | 51-55 | F | BNT162b2 | 3   |
| 78 | 56-60 | F | BNT162b2 | 4.7 |
| 79 | 20-25 | F | BNT162b2 | 3.1 |
| 80 | 55-60 | F | BNT162b2 | 5.1 |

|                |                  |                              |                                            |                   |
|----------------|------------------|------------------------------|--------------------------------------------|-------------------|
| 81             | 36-40            | M                            | BNT162b2                                   | 5                 |
| 82             | 26-30            | F                            | BNT162b2                                   | 5                 |
| 83             | 56-60            | F                            | BNT162b2                                   | 4                 |
| 84             | 20-25            | F                            | mRNA1273                                   | 4                 |
| 85             | 20-25            | F                            | BNT162b2                                   | 5                 |
| 86             | 46-50            | M                            | mRNA1273                                   | 3.4               |
| 87             | 41-45            | F                            | BNT162b2                                   | 5                 |
| 88             | 66-70            | F                            | BNT162b2                                   | 5                 |
| 89             | 36-40            | M                            | mRNA1273                                   | 3                 |
| 90             | 31-35            | F                            | BNT162b2                                   | 3                 |
| 91             | 31-35            | F                            | mRNA1273                                   | 3.4               |
| 92             | 20-25            | F                            | BNT162b2                                   | 3                 |
| 93             | 26-30            | F                            | mRNA1273                                   | 3                 |
| 94             | 20-25            | F                            | BNT162b2                                   | 3                 |
| 95             | 41-45            | F                            | BNT162b2                                   | 3                 |
| 96             | 61-65            | F                            | mRNA1273                                   | 3                 |
| 97             | 56-60            | F                            | mRNA1273                                   | 4                 |
| 98             | 41-45            | F                            | BNT162b2                                   | 49.1              |
| 99             | 26-30            | F                            | BNT162b2                                   | 49.1              |
| 100            | 56-60            | F                            | mRNA1273                                   | 3                 |
| 101            | 26-30            | F                            | mRNA1273                                   | 4                 |
| 102            | 36-40            | F                            | BNT162b2                                   | 3                 |
| 103            | 61-65            | F                            | mRNA1273                                   | 3.6               |
| 104            | 36-40            | F                            | BNT162b2                                   | 5                 |
| 105            | 26-30            | F                            | mRNA1273                                   | 3.4               |
| 106            | 20-25            | F                            | mRNA1273                                   | 4                 |
| 107            | 71-75            | F                            | mRNA1273                                   |                   |
| <b>Summary</b> | <b>Median=46</b> | <b>%M=11</b><br><b>%F=89</b> | <b>%mRNA1273=32</b><br><b>%BNT162b2=68</b> | <b>Median=4.4</b> |



**Supplementary Table 2a.**

COVID-19 era negative controls

| <b>Participant ID</b> | <b>Age</b> | <b>Sex</b> | <b>Collection period</b> | <b>Used in Fig 1, Fig. 3 or as pooled negative</b> |
|-----------------------|------------|------------|--------------------------|----------------------------------------------------|
| 108                   | 26-30      | M          | COVID era                | Fig. 3                                             |
| 109                   | 20-25      | F          | COVID era                | Fig. 3                                             |
| 110                   | 61-65      | M          | COVID era                | Fig. 3                                             |
| 111                   | 36-40      | M          | COVID era                | Fig. 3                                             |
| 112                   | 56-6-      | F          | COVID era                | Fig. 3                                             |
| 113                   | 41-45      | M          | COVID era                | Fig. 3                                             |
| 114                   | 46-50      | F          | COVID era                | Fig. 3                                             |
| 115                   | 26-30      | M          | COVID era                | Fig. 3                                             |
| 116                   | 31-35      | F          | COVID era                | Fig. 3                                             |
| 117                   | 31-35      | M          | COVID era                | Fig. 3                                             |
| 118                   | 36-40      | F          | COVID era                | Fig. 3                                             |
| 119                   | 36-40      | M          | COVID era                | Fig. 3                                             |
| 120                   | 31-35      | M          | COVID era                | Fig. 3                                             |
| 121                   | 36-40      | M          | COVID era                | Fig. 3                                             |
| 122                   | 66-70      | F          | COVID era                | Fig. 3                                             |
| 123                   | 66-70      | M          | COVID era                | Fig. 3                                             |
| 124                   | 91-95      | F          | COVID era                | Fig. 3                                             |
| 125                   | 36-40      | M          | COVID era                | Fig. 3                                             |
| 126                   | 71-75      | F          | COVID era                | Fig. 3                                             |
| 127                   | 66-70      | M          | COVID era                | Fig. 3                                             |
| 128                   | 36-40      | F          | COVID era                | Fig. 3                                             |
| 129                   | 41-45      | M          | COVID era                | Fig. 3                                             |
| 130                   | 41-45      | M          | COVID era                | Fig. 3                                             |
| 131                   | 51-55      | M          | COVID era                | Fig. 3                                             |
| 132                   | 61-65      | M          | COVID era                | Fig. 3                                             |
| 133                   | 56-60      | F          | COVID era                | Fig. 3                                             |
| 134                   | 61-65      | M          | COVID era                | Fig. 3                                             |
| 135                   | 71-75      | M          | COVID era                | Fig. 3                                             |
| 136                   | 81-85      | F          | COVID era                | Fig. 3                                             |
| 137                   | 51-55      | M          | COVID era                | Fig. 3                                             |
| 138                   | 71-75      | M          | COVID era                | Fig. 3                                             |
| 139                   | 61-65      | F          | COVID era                | Fig. 3                                             |
| 140                   | 61-65      | M          | COVID era                | Fig. 3                                             |
| 141                   | 81-85      | F          | COVID era                | Fig. 3                                             |
| 142                   | 46-50      | M          | COVID era                | Fig. 3                                             |
| 143                   | 66-70      | F          | COVID era                | Fig. 3                                             |
| 144                   | 20-25      | F          | COVID era                | Fig. 3                                             |
| 145                   | 66-70      | F          | COVID era                | Fig. 3                                             |

|                |                      |                        |           |        |
|----------------|----------------------|------------------------|-----------|--------|
| 146            | 26-30                | M                      | COVID era | Fig. 3 |
| 147            | 61-65                | F                      | COVID era | Fig. 3 |
| 148            | 61-65                | M                      | COVID era | Fig. 3 |
| 149            | 41-45                | M                      | COVID era | Fig. 3 |
| 150            | 61-65                | M                      | COVID era | Fig. 3 |
| 151            | 86-90                | M                      | COVID era | Fig. 3 |
| 152            | 81-85                | F                      | COVID era | Fig. 3 |
| 153            | 81-85                | M                      | COVID era | Fig. 3 |
| 154            | 76-80                | M                      | COVID era | Fig. 3 |
| 155            | 56-60                | M                      | COVID era | Fig. 3 |
| 156            | 56-60                | M                      | COVID era | Fig. 3 |
| <b>Summary</b> | <b>Median age=58</b> | <b>%M=63<br/>%F=37</b> |           |        |

**Supplementary Table 2b.**

Pre-COVID era negative controls

| <b>Sample ID</b> | <b>Age</b> | <b>Sex</b> | <b>Used in Fig. 1, Fig. 3 or as pooled negative</b> |
|------------------|------------|------------|-----------------------------------------------------|
| 157              | 31-35      | F          | Pooled negative                                     |
| 158              | 41-45      | F          | Pooled negative                                     |
| 159              | 41-45      | M          | Pooled negative                                     |
| 160              | 31-35      | F          | Pooled negative                                     |
| 161              | 66-70      | M          | Pooled negative                                     |
| 162              | 20-25      | F          | Pooled negative                                     |
| 163              | 31-35      | F          | Pooled negative                                     |
| 164              | 26-30      | F          | Pooled negative                                     |
| 165              | 41-45      | F          | Pooled negative                                     |
| 166              | 31-35      | M          | Pooled negative                                     |
| 167              | 26-30      | M          | Pooled negative                                     |
| 168              | 41-45      | F          | Pooled negative                                     |
| 169              | 46-50      | F          | Pooled negative                                     |
| 170              | 36-40      | F          | Pooled negative                                     |
| 171              | 56-60      | M          | Pooled negative                                     |
| 172              | 36-40      | M          | Pooled negative                                     |
| 173              | 51-55      | F          | Pooled negative                                     |
| 174              | 15-19      | M          | Pooled negative                                     |
| 175              | 20-25      | M          | Pooled negative                                     |
| 176              | 46-50      | M          | Pooled negative                                     |
| 177              | 36-40      | F          | Pooled negative                                     |
| 178              | 36-40      | F          | Pooled negative                                     |
| 179              | 46-50      | F          | Pooled negative                                     |
| 180              | 41-45      | F          | Pooled negative                                     |
| 181              | 46-50      | M          | Pooled negative                                     |
| 182              | 51-55      | F          | Pooled negative                                     |
| 183              | 31-35      | M          | Pooled negative                                     |
| 184              | 31-35      | F          | Pooled negative                                     |
| 185              | 56-60      | F          | Pooled negative                                     |
| 186              | 51-55      | F          | Pooled negative                                     |
| 187              | 26-30      | F          | Pooled negative                                     |
| 188              | 36-40      | M          | Pooled negative                                     |
| 189              | 41-45      | M          | Pooled negative                                     |
| 190              | 31-35      | F          | Pooled negative                                     |
| 191              | 26-30      | F          | Pooled negative                                     |
| 192              | 36-40      | F          | Pooled negative                                     |
| 193              | 56-60      | M          | Pooled negative                                     |
| 194              | 41-45      | M          | Pooled negative                                     |
| 195              | 41-45      | F          | Pooled negative                                     |
| 196              | 36-40      | F          | Pooled negative                                     |
| 197              | 31-35      | M          | Pooled negative                                     |

|                |                      |                        |                          |
|----------------|----------------------|------------------------|--------------------------|
| 198            | 36-40                | M                      | Pooled negative          |
| 199            | 46-50                | F                      | Pooled negative          |
| 200            | 41-45                | F                      | Pooled negative          |
| 201            | 15-19                | F                      | Pooled negative          |
| 202            | 26-30                | F                      | Pooled negative          |
| 203            | 21-25                | M                      | Pooled negative          |
| 204            | 36-40                | F                      | Pooled negative          |
| 205            | 36-40                | M                      | Pooled negative          |
| 206            | 31-35                | F                      | Pooled negative          |
| 207            | 26-30                | F                      | Pooled negative          |
| 208            | 31-35                | M                      | Fig. 3 + pooled negative |
| 209            | 32-35                | M                      | Fig. 3 + pooled negative |
| 210            | 41-45                | M                      | Fig. 3 + pooled negative |
| 211            | 51-55                | F                      | Fig. 3 + pooled negative |
| 212            | 56-60                | M                      | Fig. 3 + pooled negative |
| 213            | 56-60                | F                      | Fig. 3 + pooled negative |
| 214            | 46-50                | F                      | Fig. 3 + pooled negative |
| 215            | 41-45                | M                      | Fig. 3 + pooled negative |
| 216            | 41-45                | M                      | Fig. 3 + pooled negative |
| 217            | 36-40                | F                      | Fig. 3 + pooled negative |
| 218            | 46-50                | M                      | Fig. 3 + pooled negative |
| 219            | 41-45                | F                      | Fig. 3 + pooled negative |
| 220            | 51-55                | M                      | Fig. 3 + pooled negative |
| 221            | 41-45                | F                      | Fig. 3 + pooled negative |
| 222            | 26-30                | M                      | Fig. 3 + pooled negative |
| 223            | 41-45                | F                      | Fig. 3 + pooled negative |
| 224            | 26-30                | M                      | Fig. 3 + pooled negative |
| 225            | 31-35                | M                      | Fig. 3 + pooled negative |
| 226            | 36-40                | M                      | Fig. 3 + pooled negative |
| 227            | 41-45                | F                      | Fig. 3 + pooled negative |
| 228            | 36-40                | F                      | Fig. 3 + pooled negative |
| 229            | 15-19                | M                      | Fig. 3 + pooled negative |
| 230            | 20-25                | F                      | Fig. 3 + pooled negative |
| 231            | 46-50                | F                      | Fig. 3 + pooled negative |
| 232            | 56-60                | F                      | Fig. 3 + pooled negative |
| 233            | 61-65                | M                      | Fig. 3 + pooled negative |
| 234            | 36-40                | F                      | Fig. 3 + pooled negative |
| <b>Summary</b> | <b>Median age=39</b> | <b>%M=42<br/>%F=58</b> |                          |

**Supplementary Table 2c.**

COVID-19 patient data

| <b>Participant ID</b> | <b>Age</b> | <b>Sex</b> | <b>Days PSO</b> | <b>Status</b> | <b>Used in Fig.1 or Fig. 3</b> |
|-----------------------|------------|------------|-----------------|---------------|--------------------------------|
| 235                   | 71-75      | M          | 46              | Convalescent  | Fig. 3                         |
| 236                   | 31-35      | M          | 78              | Convalescent  | Fig. 3                         |
| 237                   | 56-60      | M          | 47              | Convalescent  | Fig. 3                         |
| 238                   | 71-75      | F          | 42              | Convalescent  | Fig. 3                         |
| 239                   | 26-30      | M          | 50              | Convalescent  | Fig. 3                         |
| 240                   | 51-55      | M          | 48              | Convalescent  | Fig. 3                         |
| 241                   | 46-50      | M          | 60              | Convalescent  | Fig. 3                         |
| 242                   | 41-45      | M          | 44              | Convalescent  | Fig. 3                         |
| 243                   | 56-60      | F          | 45              | Convalescent  | Fig. 3                         |
| 244                   | 56-60      | F          | 39              | Convalescent  | Fig. 3                         |
| 245                   | 51-55      | M          | 65              | Convalescent  | Fig. 3                         |
| 246                   | 41-45      | F          | 53              | Convalescent  | Fig. 3                         |
| 247                   | 61-65      | F          | 51              | Convalescent  | Fig. 3                         |
| 248                   | 56-60      | F          | 47              | Convalescent  | Fig. 3                         |
| 249                   | 26-30      | M          | 42              | Convalescent  | Fig. 3                         |
| 250                   | 41-45      | M          | 49              | Convalescent  | Fig. 3                         |
| 251                   | 56-60      | M          | 39              | Convalescent  | Fig. 3                         |
| 252                   | 56-60      | F          | 59              | Convalescent  | Fig. 3                         |
| 253                   | 76-80      | M          | 64              | Convalescent  | Fig. 3                         |
| 254                   | 51-55      | M          | 58              | Convalescent  | Fig. 3                         |
| 255                   | 71-75      | M          | 57              | Convalescent  | Fig. 3                         |
| 256                   | 56-60      | F          | 58              | Convalescent  | Fig. 3                         |
| 257                   | 61-65      | M          | 40              | Convalescent  | Fig. 3                         |
| 258                   | 51-55      | M          | 64              | Convalescent  | Fig. 3                         |
| 259                   | 26-30      | F          | 91              | Convalescent  | Fig. 3                         |
| 260                   | 51-55      | M          | 49              | Convalescent  | Fig. 3                         |
| 261                   | 66-70      | F          | 65              | Convalescent  | Fig. 3                         |
| 262                   | 51-55      | F          | 52              | Convalescent  | Fig. 3                         |
| 263                   | 51-55      | M          | 82              | Convalescent  | Both                           |
| 264                   | 51-55      | M          | 75              | Convalescent  | Fig. 3                         |
| 265                   | 26-30      | F          | 56              | Convalescent  | Fig. 3                         |
| 266                   | 61-65      | M          | 31              | Convalescent  | Fig. 3                         |
| 267                   | 76-80      | F          | 47              | Convalescent  | Fig. 3                         |
| 268                   | 66-70      | F          | 40              | Convalescent  | Fig. 3                         |
| 269                   | 46-50      | M          | 50              | Convalescent  | Fig. 3                         |
| 270                   | 81-85      | F          | 67              | Convalescent  | Fig. 3                         |
| 271                   | 61-65      | M          | 62              | Convalescent  | Fig. 3                         |
| 272                   | 71-75      | M          | 80              | Convalescent  | Fig. 3                         |
| 273                   | 56-60      | M          | 104             | Convalescent  | Fig. 3                         |
| 274                   | 71-75      | M          | 40              | Convalescent  | Fig. 3                         |

|                |                   |                        |                        |                                       |        |
|----------------|-------------------|------------------------|------------------------|---------------------------------------|--------|
| 275            | 81-85             | M                      | 17                     | Acute                                 | Fig. 3 |
| 276            | 41-45             | M                      | 44                     | Convalescent                          | Fig. 3 |
| 277            | 81-85             | M                      | 13                     | Acute                                 | Fig. 3 |
| 278            | 36-40             | F                      | 51                     | Convalescent                          | Fig. 3 |
| 279            | 61-70             | F                      | 53                     | Convalescent                          | Fig. 3 |
| 280            | 36-40             | M                      | 45                     | Convalescent                          | Both   |
| 281            | 51-55             | M                      | 52                     | Convalescent                          | Both   |
| 282            | 46-50             | M                      | 9                      | Acute                                 | Both   |
| 283            | 61-65             | M                      | 10                     | Acute                                 | Both   |
| 284            | 56-60             | M                      | 69                     | Convalescent                          | Both   |
| 285            | 41-45             | M                      | 24                     | Convalescent                          | Both   |
| 286            | 81-85             | F                      | 11                     | Acute                                 | Both   |
| 287            | 81-85             | F                      | 14                     | Acute                                 | Both   |
| 288            | 81-85             | M                      | 5                      | Acute                                 | Both   |
| 289            | 86-49             | M                      | 12                     | Acute                                 | Fig. 3 |
| 290            | 91-95             | F                      | 10                     | Acute                                 | Fig. 3 |
| 291            | 76-80             | M                      | 7                      | Acute                                 | Fig. 3 |
| 292            | 76-80             | M                      | 10                     | Acute                                 | Fig. 3 |
| 293            | 46-50             | M                      | 13                     | Acute                                 | Fig. 3 |
| 294            | 56-60             | M                      | 8                      | Acute                                 | Fig. 3 |
| 295            | 56-60             | M                      | 11                     | Acute                                 | Fig. 3 |
| 296            | 56-60             | F                      | 11                     | Acute                                 | Fig. 3 |
| 297            | 96-100            | F                      | 3                      | Acute                                 | Fig. 3 |
| 298            | 96-100            | F                      | 6                      | Acute                                 | Fig. 3 |
| 299            | 61-65             | M                      | 15                     | Acute                                 | Fig. 3 |
| 300            | 36-40             | M                      | 19                     | Acute                                 | Fig. 3 |
| 301            | 61-65             | F                      | 3                      | Acute                                 | Fig. 3 |
| 302            | 81-85             | F                      | 12                     | Acute                                 | Fig. 3 |
| 303            | 61-65             | F                      | 9                      | Acute                                 | Fig. 3 |
| 304            | 66-70             | M                      | 36                     | Convalescent                          | Fig. 3 |
| 305            | 31-35             | F                      | 40                     | Convalescent                          | Fig. 3 |
| 306            | 31-25             | F                      | 75                     | Convalescent                          | Both   |
| 307            | 41-35             | M                      | 86                     | Convalescent                          | Both   |
| 308            | 71-75             | F                      | 96                     | Convalescent                          | Both   |
| 309            |                   |                        |                        | Acute                                 | Fig 1  |
| 400            |                   |                        |                        | Acute                                 | Fig 1  |
| 401            |                   |                        |                        | Acute                                 | Fig 1  |
| 402            |                   |                        |                        | Acute                                 | Fig 1  |
| <b>Summary</b> | <b>Median =59</b> | <b>%M=61<br/>%F=39</b> | <b>Mean. =<br/>42d</b> | <b>%Acute=32<br/>%Convalescent=68</b> |        |

**Supplementary Table 3a.**

Bivariate and multivariable analysis examining potential independent associations between log-transformed saliva anti-Spike IgA.

|                                                    | <b>Bivariate analysis</b> | <b>Multivariable analysis</b> |
|----------------------------------------------------|---------------------------|-------------------------------|
| <b>Predictor</b>                                   | Beta coefficient (95% CI) | Beta coefficient (95% CI)     |
| Age in years                                       | 0.02 (0.01 to 0.04)       | 0.02 (0.002 to 0.04)          |
| Male sex                                           | -0.4 (-1.1 to 0.3)        | -0.4 (-1.1 to 0.3)            |
| Time from vaccination to sample collection in days | 0.01 (-0.03 to 0.05)      | 0.01 (-0.03 to 0.05)          |
| Prior SARS-CoV-2 infection                         | 1.0 (0.4 to 1.5)          | 0.9 (0.3 to 1.4)              |

Abbreviations: CI = confidence interval

**Supplementary Table 3b.**

Bivariate and multivariable analysis examining potential independent associations between saliva anti-Spike IgG.

|                                            | <b>Bivariate analysis</b> | <b>Multivariable analysis</b> |
|--------------------------------------------|---------------------------|-------------------------------|
| <b>Predictor</b>                           | Beta coefficient (95% CI) | Beta coefficient (95% CI)     |
| Age in years                               | 0.6 (-0.1 to 1.2)         | 0.4 (-0.2 to 1.1)             |
| Male sex                                   | -38.7 (-65.2 to -12.2)    | -39.5 (-65.7 to -13.3)        |
| Time from vaccination to sample collection | -0.9 (-4.7 to 2.8)        | -0.4 (-1.9 to 1.1)            |
| Prior SARS-CoV-2 infection                 | 21.3 (-0.3 to 42)         | 19.7 (-1.5 to 41)             |

Abbreviations: CI = confidence interval



**Supplementary Table 3c.**

Bivariate and multivariable analysis examining potential independent associations between log-transformed serum anti-RBD IgA.

|                                            | <b>Bivariate analysis</b> | <b>Multivariable analysis</b> |
|--------------------------------------------|---------------------------|-------------------------------|
| <b>Predictor</b>                           | Beta coefficient (95% CI) | Beta coefficient (95% CI)     |
| Age in years                               | 0.005 (-0.006 to 0.02)    | 0.0008 (-0.01 to 0.01)        |
| Male sex                                   | 0.2 (-0.2 to 0.7)         | 0.2 (-0.3 to 0.6)             |
| Time from vaccination to sample collection | -0.04 (-0.06 to -0.01)    | -0.04 (-0.06 to -0.01)        |
| Prior SARS-CoV-2 infection                 | 0.5 (0.1 to 0.9)          | 0.5 (0.2 to 0.9)              |

Abbreviations: CI = confidence interval

**Supplementary Table 4.**

MSB-1 (longitudinal mRNA 2 doses cohort)

| <b>Participant ID</b> | <b>Age</b>           | <b>Sex</b>             | <b>Vaccination Type</b> |
|-----------------------|----------------------|------------------------|-------------------------|
| 403                   | 20-25                | F                      | BNT162b2                |
| 404                   | 26-30                | F                      | BNT162b2                |
| 405                   | 26-30                | M                      | BNT162b2                |
| 406                   | 20-25                | F                      | BNT162b2                |
| 407                   | 20-25                | M                      | BNT162b2                |
| 408                   | 20-25                | M                      | BNT162b2                |
| 409                   | 20-25                | M                      | BNT162b2                |
| 410                   | 41-45                | F                      | BNT162b2                |
| 411                   | 20-25                | M                      | BNT162b2                |
| 412                   | 20-25                | F                      | BNT162b2                |
| 413                   | 31-35                | F                      | BNT162b2                |
| 414                   | 36-40                | F                      | BNT162b2                |
| 415                   | 56-50                | M                      | BNT162b2                |
| 416                   | 56-60                | M                      | BNT162b2                |
| 417                   | 20-25                | F                      | BNT162b2                |
| 418                   | 36-40                | M                      | BNT162b2                |
| 419                   | 20-25                | F                      | BNT162b2                |
| 420                   | 20-25                | F                      | BNT162b2                |
| 421                   | 31-35                | M                      | BNT162b2                |
| 422                   | 26-30                | M                      | BNT162b2                |
| 423                   | 26-30                | F                      | BNT162b2                |
| 424                   | 26-30                | F                      | BNT162b2                |
| 425                   | 26-30                | F                      | BNT162b2                |
| 426                   | 20-25                | F                      | BNT162b2                |
| 427                   | 26-30                | M                      | BNT162b2                |
| 428                   | 46-50                | M                      | BNT162b2                |
| 429                   | 41-45                | F                      | BNT162b2                |
| 430                   | 41-45                | F                      | BNT162b2                |
| 431                   | 26-30                | F                      | BNT162b2                |
| 432                   | 26-30                | M                      | BNT162b2                |
| <b>Summary</b>        | <b>Median age=27</b> | <b>%M=42<br/>%F=56</b> |                         |

**Supplementary Table 5.**

Long Term Care (LTC) residents outbreak cohort

| Participant ID | Age    | Sex    | Vaccination type | PCR-confirmed status at time of outbreak |
|----------------|--------|--------|------------------|------------------------------------------|
| 433            | 91-95  | Male   | mRNA-1273        | Infected                                 |
| 434            | 91-95  | Female | mRNA-1273        | Not infected                             |
| 435            | 91-95  | Male   | mRNA-1273        | Not infected                             |
| 436            | 96-100 | Female | mRNA-1273        | Infected                                 |
| 437            | 91-95  | Female | mRNA-1273        | Not infected                             |
| 438            | 96-100 | Female | mRNA-1273        | Not infected                             |
| 439            | 81-85  | Female | mRNA-1273        | Not infected                             |
| 440            | 86-90  | Female | mRNA-1273        | Not infected                             |
| 441            | 91-95  | Female | mRNA-1273        | Not infected                             |
| 442            | 91-95  | Female | mRNA-1273        | Not infected                             |
| 443            | 91-95  | Male   | mRNA-1273        | Not infected                             |
| 444            | 76-80  | Male   | mRNA-1273        | Not infected                             |
| 445            | 91-95  | Male   | mRNA-1273        | Infected                                 |
| 446            | 91-95  | Female | mRNA-1273        | Infected                                 |
| 447            | 86-90  | Male   | mRNA-1273        | Infected                                 |
| 448            | 96-100 | Female | mRNA-1273        | Not infected                             |

**Supplementary Table 6.**

Sheba Medical Centre Cohort (breakthrough infection post-vaccination)

| <b>Participant ID</b> | <b>Participant Age</b> | <b>Participant Sex</b> | <b>PCR-confirmed status</b> |
|-----------------------|------------------------|------------------------|-----------------------------|
| 449                   | 46-50                  | F                      | uninfected                  |
| 450                   | 46-50                  | F                      | uninfected                  |
| 451                   | 36-40                  | M                      | infected                    |
| 452                   | 46-50                  | F                      | uninfected                  |
| 453                   | 36-40                  | F                      | uninfected                  |
| 454                   | 41-45                  | M                      | uninfected                  |
| 455                   | 51-55                  | F                      | uninfected                  |
| 456                   | 46-50                  | F                      | uninfected                  |
| 457                   | 46-50                  | M                      | uninfected                  |
| 458                   | 41-45                  | M                      | uninfected                  |
| 459                   | 51-55                  | M                      | uninfected                  |
| 460                   | 46-50                  | F                      | uninfected                  |
| 461                   | 51-55                  | M                      | infected                    |
| 462                   | 51-55                  | M                      | uninfected                  |
| 463                   | 46-50                  | F                      | uninfected                  |
| 464                   | 46-50                  | F                      | uninfected                  |
| 465                   | 41-45                  | M                      | uninfected                  |
| 466                   | 41-45                  | F                      | uninfected                  |
| 467                   | 46-50                  | M                      | uninfected                  |
| 468                   | 56-60                  | F                      | uninfected                  |
| 469                   | 51-55                  | F                      | uninfected                  |
| 470                   | 46-50                  | F                      | uninfected                  |
| 471                   | 41-45                  | F                      | uninfected                  |
| 472                   | 46-50                  | M                      | uninfected                  |
| 473                   | 46-50                  | F                      | uninfected                  |
| 474                   | 41-45                  | M                      | uninfected                  |
| 475                   | 61-65                  | F                      | uninfected                  |
| 476                   | 61-65                  | M                      | uninfected                  |
| 477                   | 41-45                  | F                      | infected                    |
| 478                   | 31-35                  | M                      | infected                    |
| 479                   | 61-65                  | F                      | uninfected                  |
| 480                   | 51-55                  | F                      | uninfected                  |
| 481                   | 36-40                  | M                      | uninfected                  |
| 482                   | 41-45                  | M                      | infected                    |
| 483                   | 26-30                  | M                      | uninfected                  |
| 484                   | 46-50                  | M                      | uninfected                  |

|                |                           |               |            |
|----------------|---------------------------|---------------|------------|
| 485            | 41-45                     | M             | uninfected |
| 486            | 41-45                     | M             | uninfected |
| 487            | 46-50                     | F             | uninfected |
| 488            | 31-35                     | M             | uninfected |
| 489            | 51-55                     | F             | uninfected |
| 490            | 46-50                     | F             | uninfected |
| 491            | 51-55                     | M             | uninfected |
| 492            | 36-40                     | M             | uninfected |
| 493            | 46-50                     | M             | uninfected |
| 494            | 36-40                     | M             | uninfected |
| 495            | 46-50                     | M             | uninfected |
| 496            | 46-50                     | M             | uninfected |
| 497            | 51-55                     | F             | infected   |
| 498            | 46-50                     | M             | infected   |
| 499            | 41-45                     | F             | uninfected |
| 500            | 46-50                     | F             | infected   |
| 501            | 46-50                     | F             | uninfected |
| 502            | 46-50                     | F             | uninfected |
| 503            | 51-55                     | F             | uninfected |
| 504            | 46-50                     | F             | infected   |
| 505            | 41-45                     | M             | uninfected |
| 506            | 41-45                     | F             | uninfected |
| 507            | 46-50                     | F             | uninfected |
| 508            | 46-50                     | F             | uninfected |
| 509            | 46-50                     | F             | uninfected |
| 510            | 61-65                     | F             | uninfected |
| 511            | 36-40                     | M             | infected   |
| 512            | 41-45                     | M             | uninfected |
| 513            | 46-50                     | F             | uninfected |
| 514            | 46-50                     | F             | infected   |
| 515            | 36-40                     | M             | uninfected |
| <b>Summary</b> | <b>Median<br/>Age= 47</b> | <b>%F=54%</b> |            |
|                |                           | <b>%M=46%</b> |            |
